# Supplementary material for: Photoinduced electron transfer in [10]CPP⊃C60 oligomers with stable and well-defined supramolecular structures
Source: Royal Society of Chemistry journal article supplement (doi:10.1039/d3cp02233a), 2023-01-01
Supplement: d3cp02233a1.pdf [file d3cp02233a1.pdf]

## SUPPORTING INFORMATION FOR:

### Photoinduced electron transfer in [10]CPP $\supset$ C<sub>60</sub> oligomers with stable and well-defined supramolecular structure

Anton J. Stasyuk,<sup>\*a,b</sup>

a. Institut de Química Computacional i Catàlisi and Departament de Química, Universitat de Girona, C/ Maria Aurèlia Capmany 69, 17003 Girona, Spain.

#### Abstract

Recent synthesis of a new type of polymers containing conjugated cycloparaphenylene (CPP) macrocycles interconnected by a linear conjugated backbone opens up a fantastic potential of cyclic  $\pi$ -conjugated materials in organic photovoltaics. In this work, we report a theoretical study of ground and excited state properties of such polymer and investigate an effect of inclusion of fullerene molecules into polymer chains. MD simulations revealed that oligomers ([10]CPP\_Fused $\supset$ C<sub>60</sub>)<sub>24</sub> and ([10]CPP\_Fused $\supset$ C<sub>60</sub>)<sub>32</sub> with  $\pi$ -extended linker between CPPs tend to form stable, helix-like structures. We show that photoinduced electron transfer from the CPP-based polymer to C<sub>60</sub> fullerene is favorable and occurs on nanosecond time scale. Fast hole- and excess-electron transfer rates was found to be significantly faster than corresponding charge recombination rates.

## Table of Contents

|                                                                                                                                                                                                                            |          |
|----------------------------------------------------------------------------------------------------------------------------------------------------------------------------------------------------------------------------|----------|
| 1. Computational Methodology                                                                                                                                                                                               | p. 2-7   |
| 2. <b>Figure S1.</b> Two conformations of fullerene-free <b>([10]CPP)<sub>8</sub></b> oligomer.                                                                                                                            | p. 8     |
| 3. <b>Figure S2.</b> Frames with highest, lowest and average RMSD values from MD trajectory of <b>([10]CPP_Fused<math>\supset</math>C<sub>60</sub>)<sub>8</sub></b> .                                                      | p. 9     |
| 4. <b>Figure S3.</b> RMSD diagrams for MD simulation runs of <b>([10]CPP_Fused)<sub>24</sub></b> and <b>([10]CPP_Fused<math>\supset</math>C<sub>60</sub>)<sub>32</sub></b> oligomers with zoomed regions of interest.      | p. 10    |
| 5. <b>Figure S4.</b> Results of 5 ns of MD simulation runs at 500K for <b>([10]CPP_Fused)<sub>24</sub></b> and <b>([10]CPP_Fused<math>\supset</math>C<sub>60</sub>)<sub>32</sub></b> oligomers                             | p. 11    |
| 6. <b>Figure S5.</b> Structures of <b>U1</b> and <b>U2</b> complexes and fragmentation scheme.                                                                                                                             | p. 12    |
| 7. <b>Figure S6.</b> QTAIM molecular graph for <b>U1</b> and <b>U2</b> complexes.                                                                                                                                          | p. 12    |
| 8. <b>Figure S7.</b> Plot of RDG vs. $\text{sign}(\lambda_2) \times \rho$ for <b>U1</b> and <b>U2</b> complexes.                                                                                                           | p. 13    |
| 9. <b>Figure S8.</b> NCI isosurfaces of van der Waals interactions for <b>U1</b> and <b>U2</b> complexes.                                                                                                                  | p. 13    |
| 10. <b>Figure S9.</b> MO representing different states for HT and EET.                                                                                                                                                     | p. 14    |
| 11. <b>Table S1.</b> Electronic coupling in a series of randomly selected <i>syn</i> and <i>anti</i> conformers of <b>([10]CPP)<sub>8</sub></b>                                                                            | p. 15    |
| 12. <b>Table S2.</b> Interaction energies computed for <b>U1</b> and <b>U2</b> complexes using different partitioning schemes.                                                                                             | p. 15    |
| 13. <b>Table S3.</b> Charge separation between fragments in ground state for <b>U1</b> and <b>U2</b> complexes.                                                                                                            | p. 16    |
| 14. <b>Table S4.</b> QTAIM parameters for selected bond critical points related to non-covalent interactions in <b>U1</b> and <b>U2</b> complexes computed in the gas phase.                                               | p. 16-18 |
| 15. <b>Table S5.</b> Relative energies and solvation energies calculated for studied complexes in DCM.                                                                                                                     | p. 18    |
| 16. <b>Table S6.</b> Computed semi-classical rates and characteristic times ( $\tau$ in ns) for the charge separation in <b>U1</b> and <b>U2</b> , complexes in DCM solution using different effective Huang-Rhys factors. | p. 19    |
| 17. Cartesian coordinates of <b>U1</b> and <b>U2</b> complexes                                                                                                                                                             | p. 20-26 |
| 18. References                                                                                                                                                                                                             | p. 27-29 |

## Computational Methodology

### Quantum-chemical calculations

Geometry optimizations were performed employing BLYP<sup>1, 2</sup> exchange–correlation functional with def2-SVP basis set<sup>3, 4</sup> and resolution of identity approximation (RI, alternatively termed density fitting)<sup>5, 6</sup> implemented in the ORCA 4.2.1 program.<sup>7-9</sup> The empirical D3 dispersion correction with Becke–Johnson damping<sup>10,11</sup> was employed. Vertical excitation energies were calculated using TDA formalism<sup>12</sup> with range-separated CAM-B3LYP<sup>13</sup> functional and def2-SVP basis set,<sup>3, 4</sup> using Gaussian 16 (rev. A03).<sup>14</sup> The same program was used for population analysis and calculation of Mulliken,<sup>15,16</sup> Löwdin,<sup>17</sup> Hirshfeld,<sup>18</sup> CM5,<sup>19</sup> and iterative Hirshfeld<sup>20</sup> charges. Interaction energy of the complexes was computed using BLYP functional coupled with def2-TZVP basis<sup>3,4</sup> (BLYP-D3(BJ)/def2-TZVP//BLYP-D3(BJ)/def2-SVP). Energy decomposition analysis (EDA) was performed using the Amsterdam Density Functional (ADF) program.<sup>21</sup> The excited states have been analyzed in terms of the natural transition orbitals (NTO) concept introduced by Luzanov *et al.*<sup>22</sup> and implemented within modern many-body codes by Head-Gordon *et al.*<sup>23</sup> Molecular structures and frontier molecular orbitals were visualized by Chemcraft 1.8 program.<sup>24</sup>

### Energy decomposition analysis

The interaction energy in the gas phase was examined in the framework of the Kohn-Sham MO model using a quantitative energy decomposition analysis (EDA)<sup>25-27</sup> into electrostatic interactions, Pauli repulsive orbital interactions, and attractive orbital interactions, to which a term  $\Delta E_{\text{disp}}$  is added to account for the dispersion correction:

$$\Delta E_{\text{int}} = \Delta E_{\text{elstat}} + \Delta E_{\text{Pauli}} + \Delta E_{\text{oi}} + \Delta E_{\text{disp}} \quad (1)$$

The term  $\Delta V_{\text{elstat}}$  corresponds to the classical electrostatic interactions between the unperturbed charge distributions of the prepared (i.e. deformed) fragments and is usually attractive. The Pauli repulsion,  $\Delta E_{\text{Pauli}}$ , comprises the destabilizing interactions between occupied orbitals and is responsible for any steric repulsion. The orbital interactions,  $\Delta E_{\text{oi}}$ , account for electron-pair bonding, charge transfer (*i.e.*, donor–acceptor interactions between occupied orbitals on one moiety and unoccupied orbitals on the other, including HOMO-LUMO interactions) and polarization (empty-occupied orbital mixing on one fragment due to the presence of another fragment). The term  $\Delta E_{\text{disp}}$  accounts for the dispersion corrections.<sup>28,29</sup>

### Analysis of excited states

The quantitative analysis of exciton delocalization and charge transfer in the donor-acceptor complexes was carried out in terms of the transition density.<sup>30-32</sup> The analysis was done in the Löwdin orthogonalized basis, which is more convenient. The matrix  ${}^{\lambda}\mathbf{C}$  of orthogonalized MO coefficients is obtained from the coefficients  $\mathbf{C}$  in the original basis  ${}^{\lambda}\mathbf{C} = \mathbf{S}^{1/2} \mathbf{C}$ , where  $\mathbf{S}$  is the atomic orbital overlap matrix. The transition density matrix  $T_{\alpha\beta}^{0i}$  for an excited state  $\Phi^*$  constructed as a superposition of singly excited configurations (where an occupied MO  $\psi_i$  is replaced a virtual MO  $\psi_a$ ) is computed,

$$T_{\alpha\beta}^{0i} = \sum_{ia} A_{i \rightarrow a} {}^{\lambda}C_{\alpha i} {}^{\lambda}C_{\beta a} \quad (2)$$

where  $A_{i \rightarrow a}$  is the expansion coefficient.

A key quantity  $\Omega(D,A)$  is determined by:

$$\Omega(D,A) = \sum_{\alpha \in D, \beta \in A} (T_{\alpha\beta}^{0i})^2 \quad (3)$$

The weights of local excitations on D and A are  $\Omega(D,D)$  and  $\Omega(A,A)$ . The weight of electron transfer configurations  $D \rightarrow A$  and  $A \rightarrow D$  is represented by  $\Omega(D,A)$  and  $\Omega(A,D)$ , respectively. The index  $\Delta q$ , which describes charge separation and charge transfer between D and A, is

$$\Delta q(\text{CS}) = \sum \Omega(D,A) - \Omega(A,D) \quad (4)$$

$$\Delta q(\text{CT}) = \sum \Omega(D,A) + \Omega(A,D) \quad (5)$$

### Solvent Effects

The equilibrium solvation energy  $E_s^{\text{eq}}$  of a molecule (in the ground or excited state) in the medium with the dielectric constant  $\varepsilon$  was estimated using a COSMO-like polarizable continuum model<sup>33-36</sup> in the monopole approximation:

$$E_s^{\text{eq}}(Q, \varepsilon) = -\frac{1}{2} f(\varepsilon) Q^+ D Q \quad (6)$$

where the  $f(\varepsilon)$  is the dielectric scaling factor,  $f(\varepsilon) = \frac{\varepsilon - 1}{\varepsilon}$ ,  $\mathbf{Q}$  -the vector of  $n$  atomic charges in the molecular system,  $\mathbf{D}$  is the  $n \times n$  symmetric matrix determined by the shape of the boundary surface between solute and solvent.  $\mathbf{D} = \mathbf{B}^+ \mathbf{A}^{-1} \mathbf{B}$ , where the  $m \times m$  matrix  $\mathbf{A}$  describes electrostatic interaction between  $m$  surface charges and the  $m \times n$   $\mathbf{B}$  matrix describes the interaction of the surface charges with  $n$  atomic charges of the solute.<sup>33,37</sup> The GEPOL93 scheme<sup>38</sup> was used to construct the molecular boundary surface.

The charge on atom X in the excited state  $\Phi_i, q_X^i$ , was calculated as:

$$q_X^i = q_X^0 + \Delta_X^i, \quad \Delta_X^i = \sum_{Y \neq X} \sum_{\alpha \in X, \beta \in Y} (T_{\alpha\beta}^{0i} T_{\alpha\beta}^{0i} - T_{\beta\alpha}^{0i} T_{\beta\alpha}^{0i}), \quad (7)$$

where  $q_X^0$  is the atomic charge on A in the ground state and  $\Delta_X^i$  is its change due to the redistribution of the electron density between the atoms X and the rest of atoms Y which is caused by the excitation  $\psi_0 \rightarrow \psi_i$ .

The non-equilibrium solvation energy for excited state  $\psi_i$  can be estimated as:<sup>39</sup>

$$E_s^{\text{neq}}(Q^0, \Delta, \varepsilon, n^2) = f(\varepsilon) \Delta^+ D Q^0 - \frac{1}{2} f(n^2) \Delta^+ D \Delta, \quad (8)$$

In Eq. (8),  $n^2$  (the refraction index squared) is the optical dielectric constant of the medium and the vector  $\Delta$  describes the change of atomic charges in the molecule by excitation in terms of atomic charges, see Eq. (7). By definition, the external (solvent) reorganization energy is the difference of the non-equilibrium (Eq. 8) and equilibrium (Eq. 6) solvation energies of the excited state.

## Electron transfer rates

The rate of the nonadiabatic electron transfer (ET),  $k_{ET}$ , can be expressed in terms of the electronic coupling squared,  $V^2$ , and the Franck-Condon Weighted Density of states (FCWD):

$$k_{ET} = \frac{2\pi}{\hbar} V^2 (FCWD) \quad (9)$$

that accounts for the overlap of vibrational states of donor and acceptor and can be approximately estimated using the classical Marcus equation:<sup>40</sup>

$$(FCWD) = (4\pi\lambda kT)^{-1/2} \exp\left[-\frac{(\Delta G^0 + \lambda)^2}{4\lambda kT}\right] \quad (10)$$

where  $\lambda$  is the reorganization energy and  $\Delta G^0$  is the standard Gibbs energy change of the process. The fragment charge difference (FCD)<sup>41,42</sup> method was employed to calculate the electronic couplings in this work.

The Marcus expression is derived for the high-temperature condition,  $\hbar\omega_l \ll kT$ , for all vibrational modes  $l$ . The semi-classical description of ET<sup>43,44</sup> includes the effect of the quantum vibrational modes in an effective way, the solvent (low frequency) modes are treated classically, while a single high-frequency intramolecular mode  $\omega_i$ ,  $\hbar\omega_i \gg kT$ , is described quantum mechanically. Because ET occurs normally from the lowest vibrational level of the initial state, the rate  $k$  can be expressed as a sum over all channels connecting the initial state with the vibrational quantum number  $n = 0$  to manifold vibrational levels of the final state,

$$k = \sum_{n=0}^{\infty} k_{0 \rightarrow n}, \text{ where } k_{0 \rightarrow n} = \frac{2\pi}{\hbar} V_{0 \rightarrow n}^2 \frac{1}{\sqrt{4\pi\lambda_s kT}} \exp\left[-\frac{(\Delta G + n\hbar\omega_i + \lambda_s)^2}{4\lambda_s kT}\right] \quad (11)$$

with

$$V_{0 \rightarrow n}^2 = V^2 \frac{S^n}{n!} \exp(-S) \quad (12)$$

An effective value of the Huang-Rhys factor  $S$  is estimated from the internal reorganization energy  $\lambda_i$ ,

$$S = \lambda_i / \hbar\omega_i$$

As seen, an additional parameter (as compared to the Marcus equation) enters the semi-classical expression - the frequency  $\omega_i$  of a vibrational mode that effectively describes the nuclear intramolecular relaxation following the ET. Typically, in organic systems (including fullerene and nanotube derivatives) the main contribution to the internal reorganization energy is due to stretching of C=C bonds (the corresponding frequencies are found to be in the range 1400-1800  $\text{cm}^{-1}$ ). Thus, the effective frequency was set to 1600  $\text{cm}^{-1}$ . We have demonstrated that varying the parameter  $\omega_i$  within a reasonable range does not change significantly the computed ET rate (Table S4).

## Reorganization energy

The reorganization energy is usually divided into two parts,  $\lambda = \lambda_i + \lambda_s$ , including internal and solvent terms. The solvent reorganization energy corresponds to the energy required to move solvent molecules from

the position they occupy in the initial state to the location they have in the CT state, but without charge transfer having occurred. The  $\lambda_s$  for a particular CT states was computed as a difference between the equilibrium ( $E^{eq}$ , see eq. 6) and non-equilibrium ( $E^{neq}$ , see eq. 8) solvation energies for states of interest. The internal reorganization energy  $\lambda_i$  corresponds to the energy of structural changes when donor/acceptor fragments going from initial-state geometries to final-state geometries.

$\lambda_i = \lambda_i^1 + \lambda_i^2$ , where :

$$\lambda_i^1(C_{60}^* \rightarrow C_{60}^-) = \frac{1}{2} \left[ \left( (C_{60}^*)_+ - (C_{60}^*)_+ \right) + \left( (C_{60}^-)_- - (C_{60}^-)_- \right) \right] \quad (13)$$

$$\lambda_i^2(CPP^0 \rightarrow CPP^+) = \frac{1}{2} \left[ \left( (CPP^0)_+ - (CPP^0)_+ \right) + \left( (CPP^+)_0 - (CPP^+)_+ \right) \right]$$

### Interaction energies

The interaction energies were calculated directly from electronic energy of complex and electronic energies of subsystems. For **U1** and **U2** complexes, the interaction energy can be expressed as:

$$\begin{aligned} E_{int}^{Type1} &= E_{([10]CPP\_Fused)_{2 \supset C_{60}}} - (E_{([10]CPP\_Fused)_2} + E_{C_{60}}) \\ E_{int}^{Type2} &= E_{([10]CPP\_Fused \supset C_{60})_2} - (E_{([10]CPP\_Fused)_{2 \supset C_{60}^1}} + E_{C_{60}^2}) \\ E_{int}^{Type3} &= E_{C_{60}^1 \cdots C_{60}^2} - (E_{C_{60}^1} + E_{C_{60}^2}) \\ E_{int}^{TOTAL} &= E_{([10]CPP\_Fused \supset C_{60})_2} - (E_{([10]CPP\_Fused)_2} + E_{C_{60}^1} + E_{C_{60}^2}) \end{aligned} \quad (14)$$

### Quantum Theory of Atoms in Molecules (QTAIM)

Topological analysis of the electron distribution was conducted using the “Quantum Theory of Atoms in Molecules” (QTAIM) approach proposed by Bader.<sup>45,46</sup> Electron density properties measured at the bond critical point (BCP, saddle point on electron density curvature corresponding to a minimum in the direction of the atomic interaction line and a maximum in two perpendicular directions) give information about the character of different chemical bonds.<sup>47-49</sup> The AIMALL suite of programs<sup>50</sup> was applied to evaluate the BCP properties and the associated bond descriptors – the electron density [ $\rho(r)$ ] in BCPs, its Laplacian [ $\nabla^2\rho(r)$ ], potential energy density [ $V(r)$ ], kinetic energy density [ $G(r)$ ], and total electron energy density [ $H(r)$ ].

### Non-covalent interactions (NCI)

The NCI method<sup>51-53</sup> relies on two scalar fields to map local bonding properties: the electron density ( $\rho$ ) and the reduced-density gradient (RDG,  $s$ ), defined as:

$$s = \frac{1}{2(3\pi)^{1/3}} \frac{|\nabla\rho|}{\rho^{4/3}} \quad (15)$$

a quantity that is essential to the design of DFT functionals. The combination of  $s$  and  $\rho$  allows a rough partition of real space into bonding regions: high- $s$  low- $\rho$  corresponds to non-interacting density tails, low- $s$  high- $\rho$  to covalent bonds, and low- $s$  low- $\rho$  to non-covalent interactions. The NCI analysis was carried out at the CAM-B3LYP/def2-SVP level using Multiwfn program.<sup>54</sup>

### **Molecular Dynamics Simulation**

Molecular Dynamics Simulation was performed using Tinker-HP 1.1 program suit.<sup>55-58</sup> Initial structures of studied oligomers were generated using optimized structural parameters for ([10]\_CPP\_Fused $\Rightarrow$ C<sub>60</sub>)<sub>2</sub> complex. The minimized geometry was subjected to simulations. MD simulations were performed using classical Merck molecular force field (MMFF)<sup>59-63</sup> with a step size of 0.5 fs up to a total of 5 or 10 ns (depending on particular oligomer) at 300 K within NVT ensemble (Andersen thermostat)<sup>64,65</sup> using dynamic module in Tinker-HP program. For small 8-unit oligomers, MD simulations were started from 5 different initial geometries, which differ by dihedral angle between monomer units. For the 24-unit oligomer, the simulations were carried out twice, starting from the same initial geometry. Root Mean Square Deviation (RMSD) was used to show how much molecular structure deviates from an initial geometry. All non-hydrogen atoms were taken into account in the RMSD calculation. The final representative structure was taken as the average structure of the last 1 ns (1000 frames). Data analysis and figure rendering were done using VMD software.<sup>66</sup>

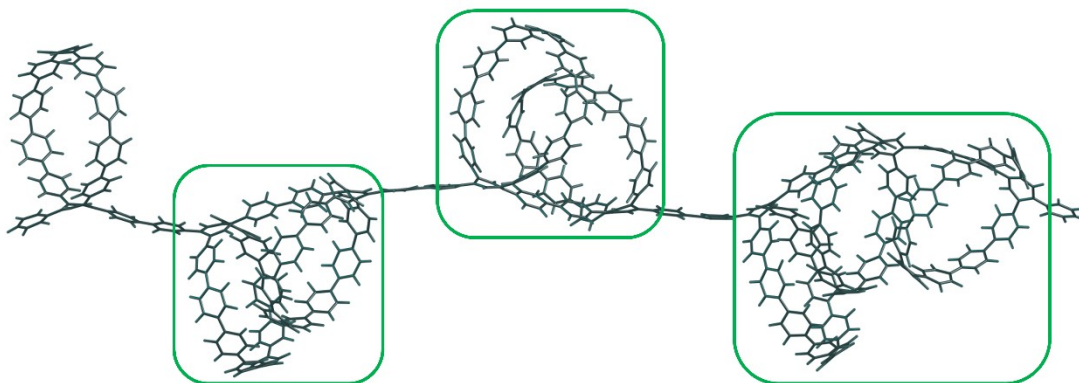

**$([10]CPP)_8$  Conformer 1**

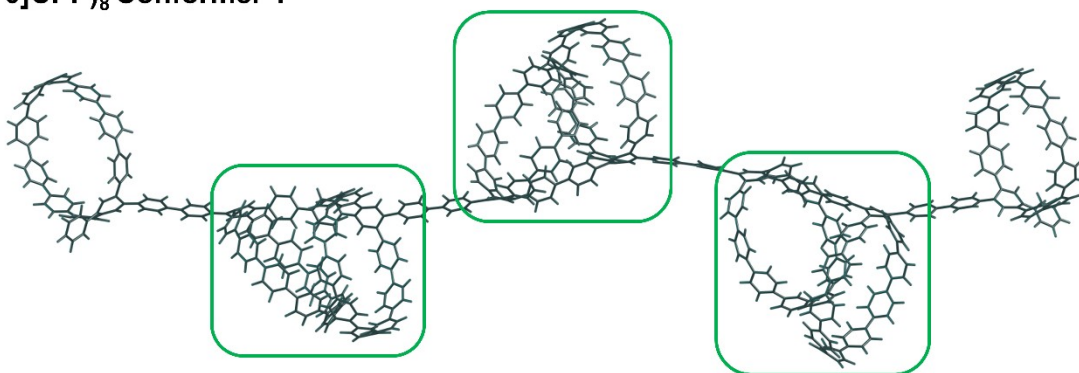

**$([10]CPP)_8$  Conformer 2**

**Figure S1.** Two conformations observed in MD simulation of fullerene-free  $([10]CPP)_8$  oligomer.



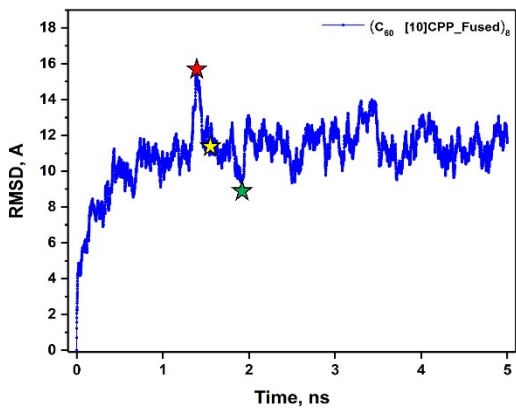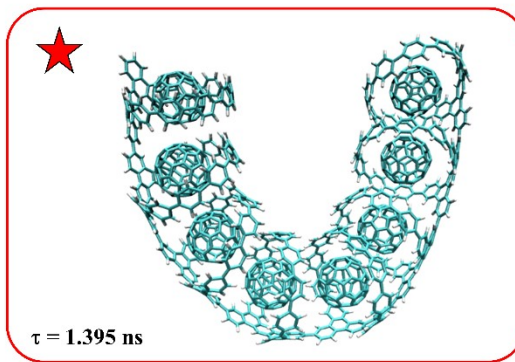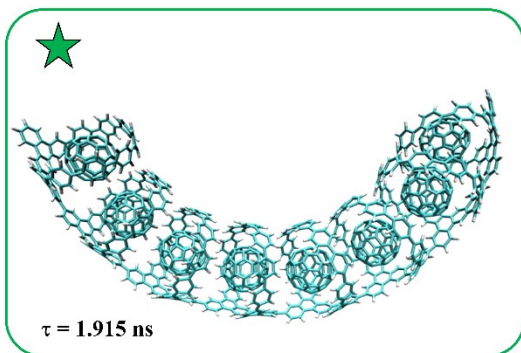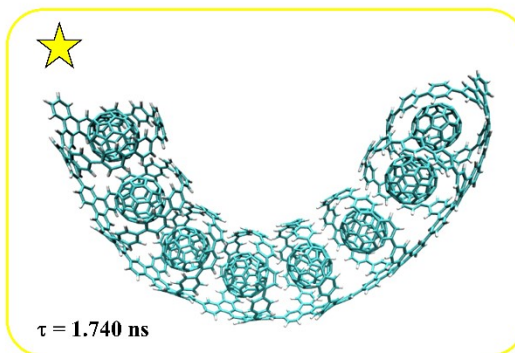

**Figure S2.** Frames with highest (red star), lowest (green star) and average (yellow star) RMSD values from MD trajectory of  $([10]CPP\_Fused \supset C_{60})_8$ .

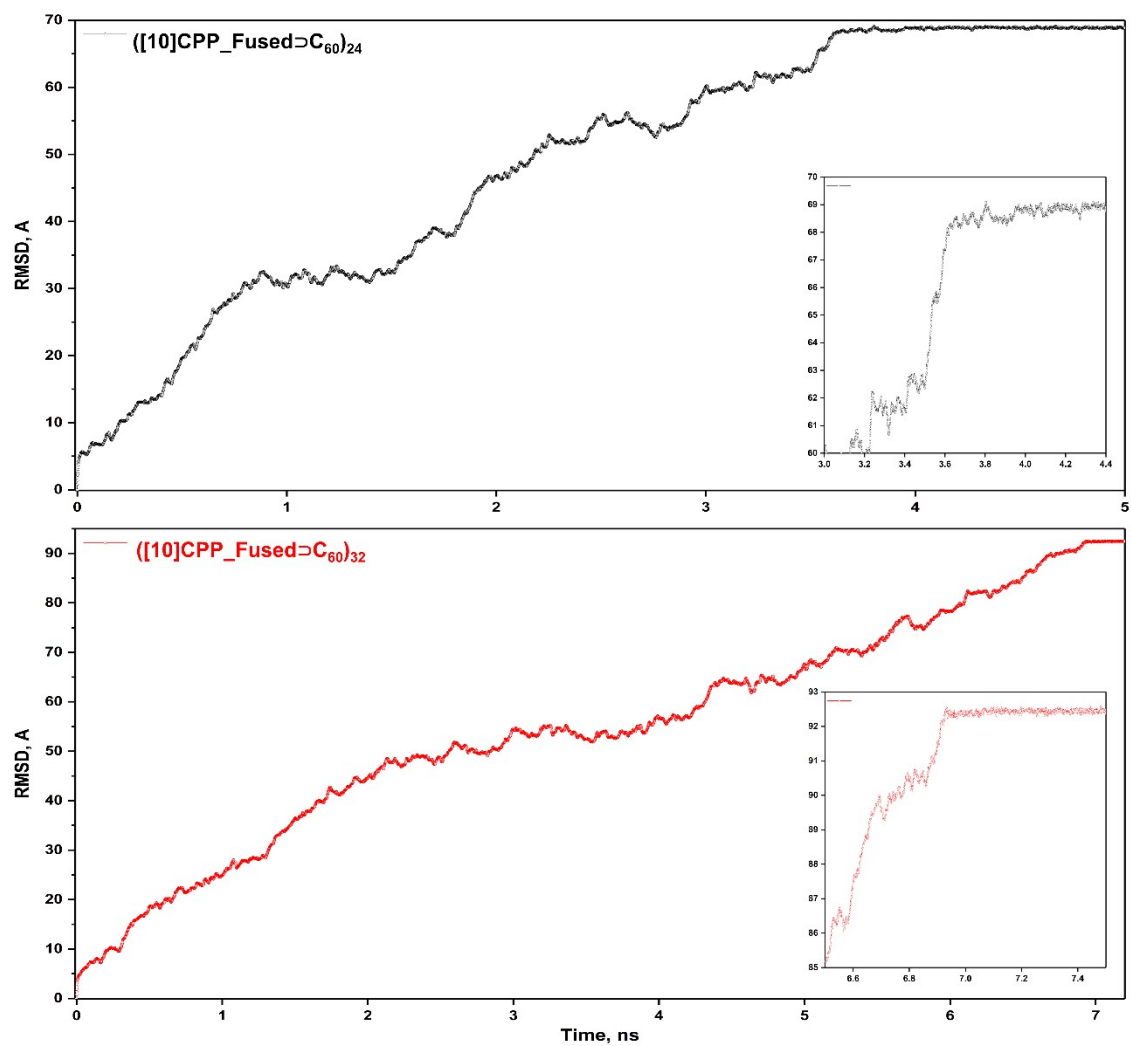

**Figure S3.** RMSD diagrams for MD simulation runs of  $([10]CPP\_Fused)_{24}$  and  $([10]CPP\_Fused\supset C_{60})_{32}$  oligomers with zoomed regions of interest.

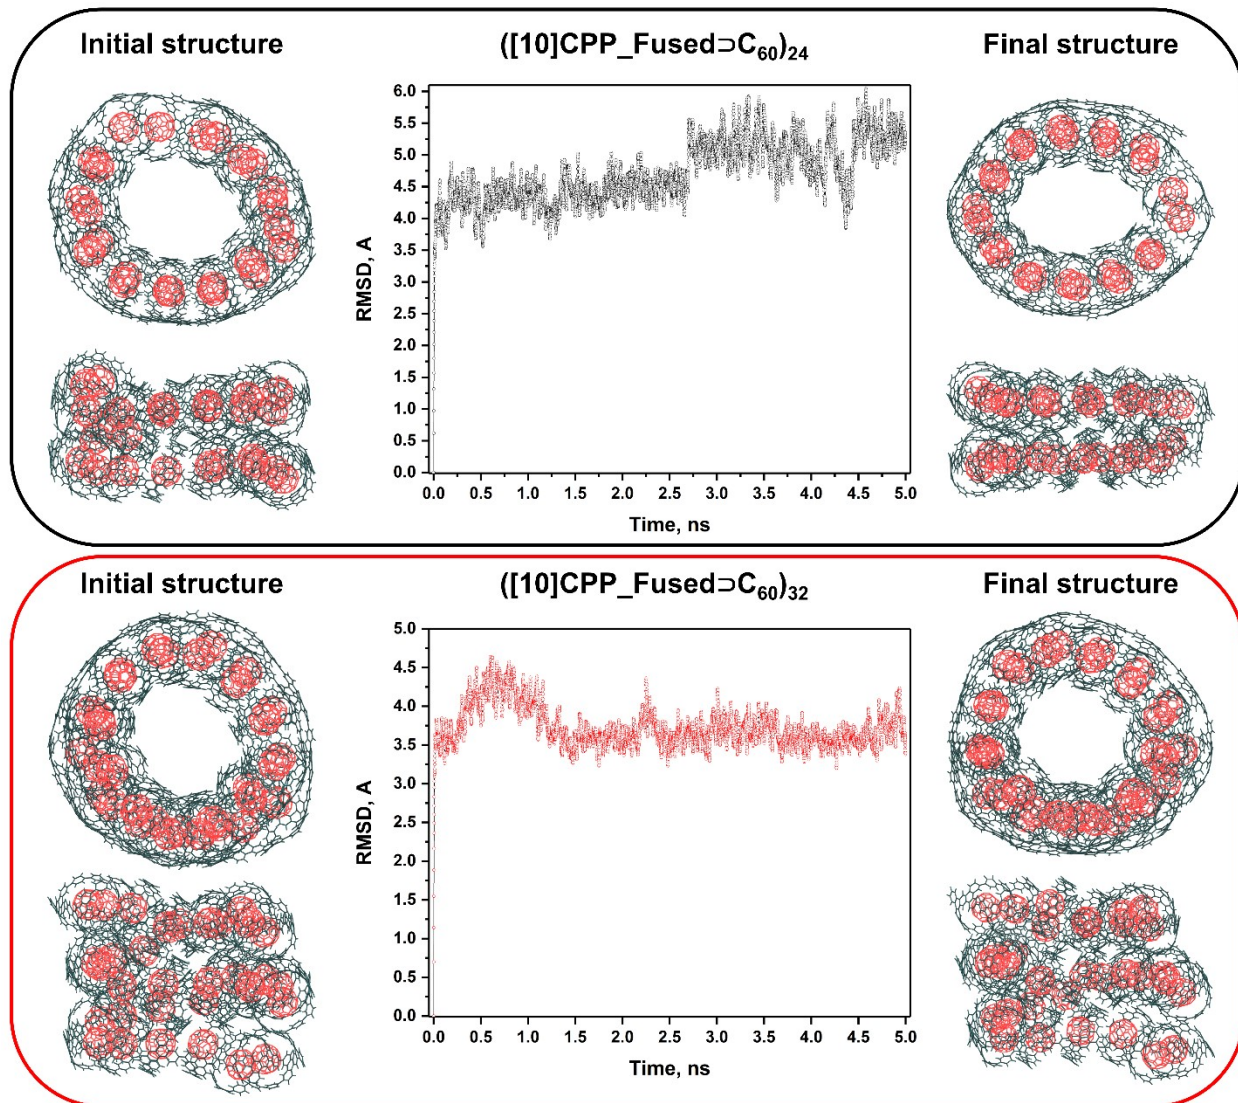

**Figure S4.** Initial and final representative structures of  $([10]CPP\_Fused)_{24}$  and  $[10]CPP\_Fused\supset C_{60})_{32}$  oligomers of 5 ns of MD simulation runs at 500K.

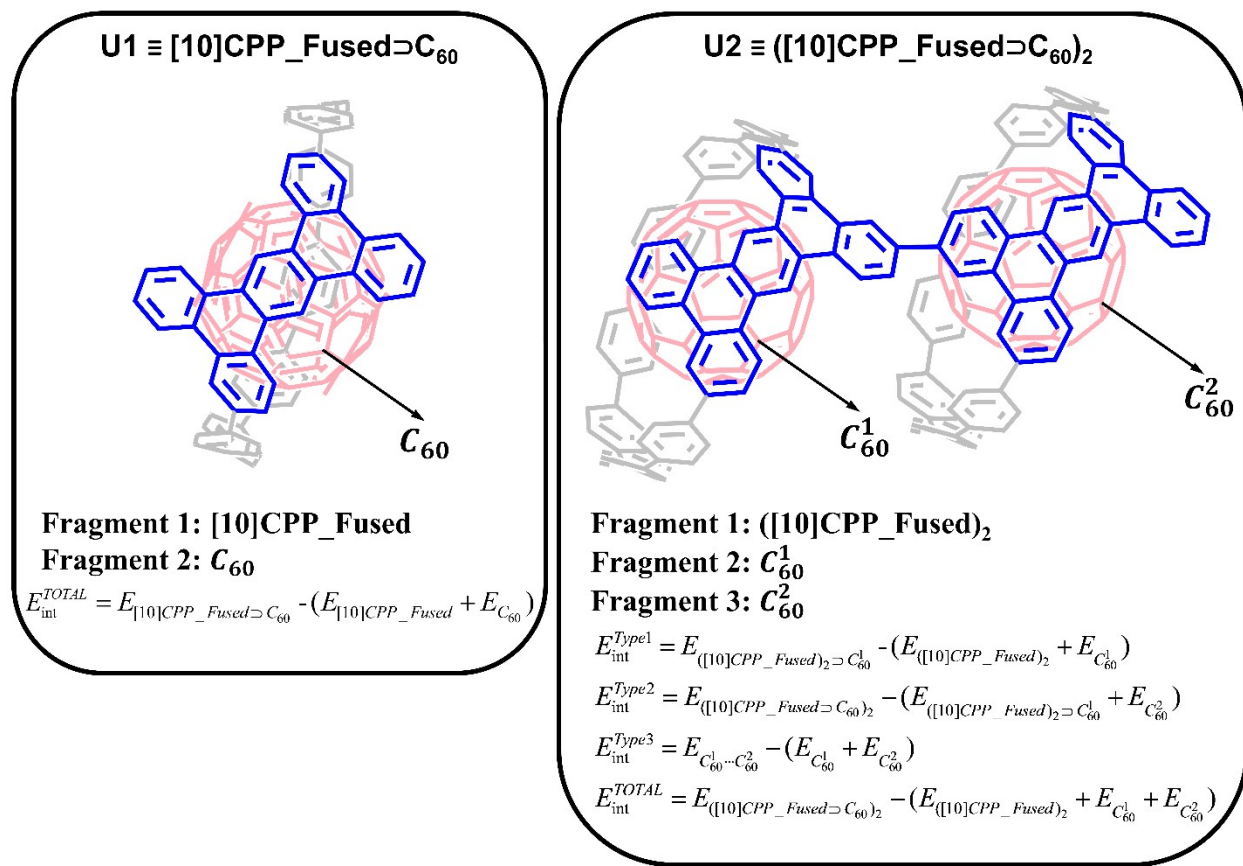

**Figure S5.** Structures of of **U1** and **U2** complexes and fragmentation scheme.

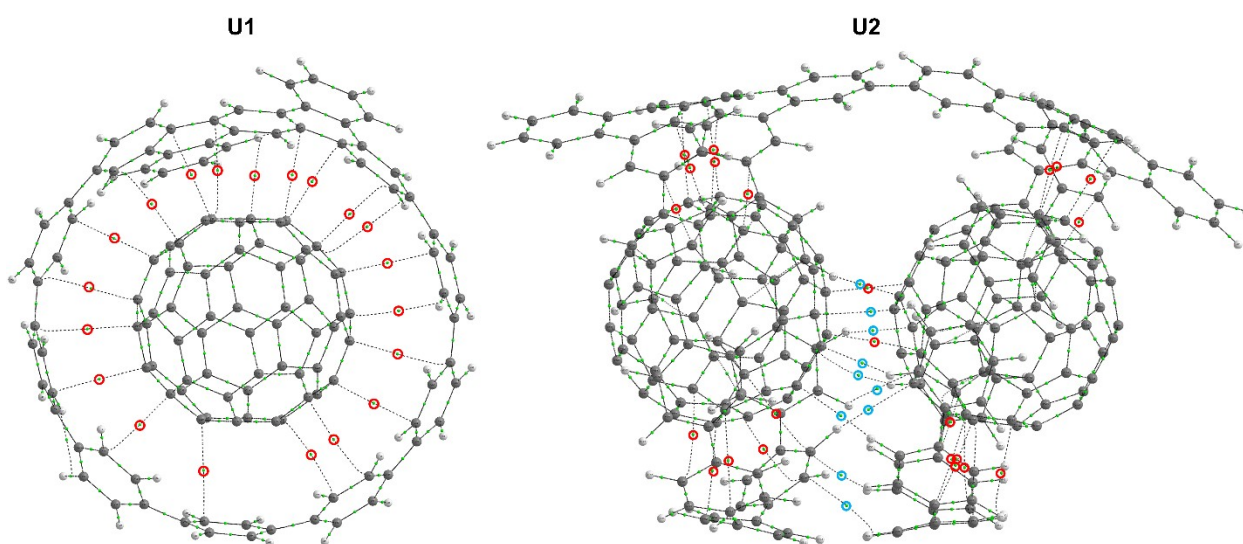

**Figure S6.** QTAIM molecular graph for **U1** and **U2** complexes. Lines connecting the nuclei are the bond paths. Small green dots correspond to BCPs. BCPs of interest are marked by red and blue circles. Red circles correspond to  $C \cdots C$  contacts while the blue one to  $H \cdots C$  contacts.

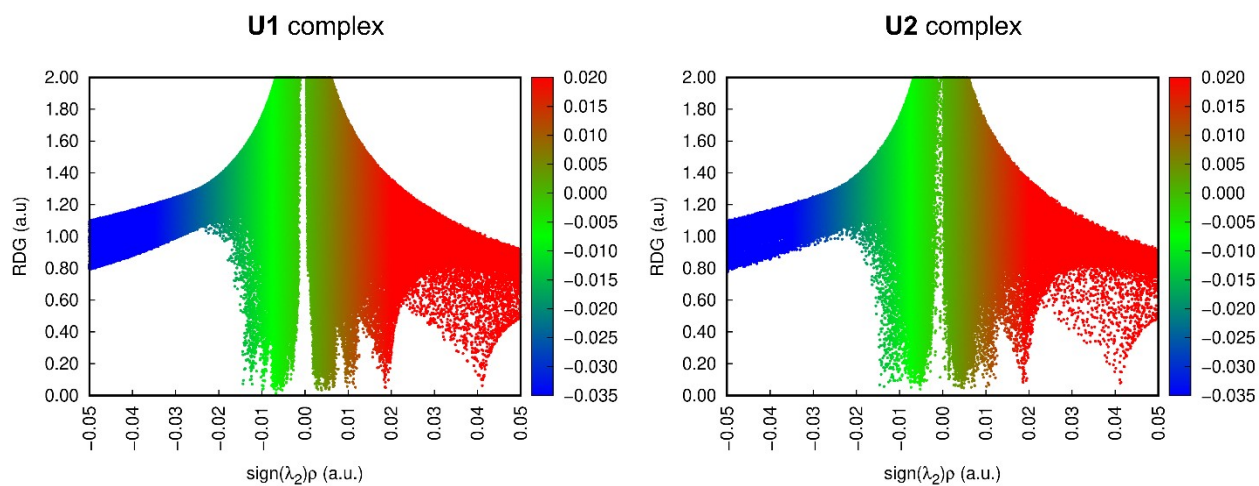

**Figure S7.** Plot of RDG vs.  $\text{sign}(\lambda_2)\rho$  for **U1** and **U2** complexes.

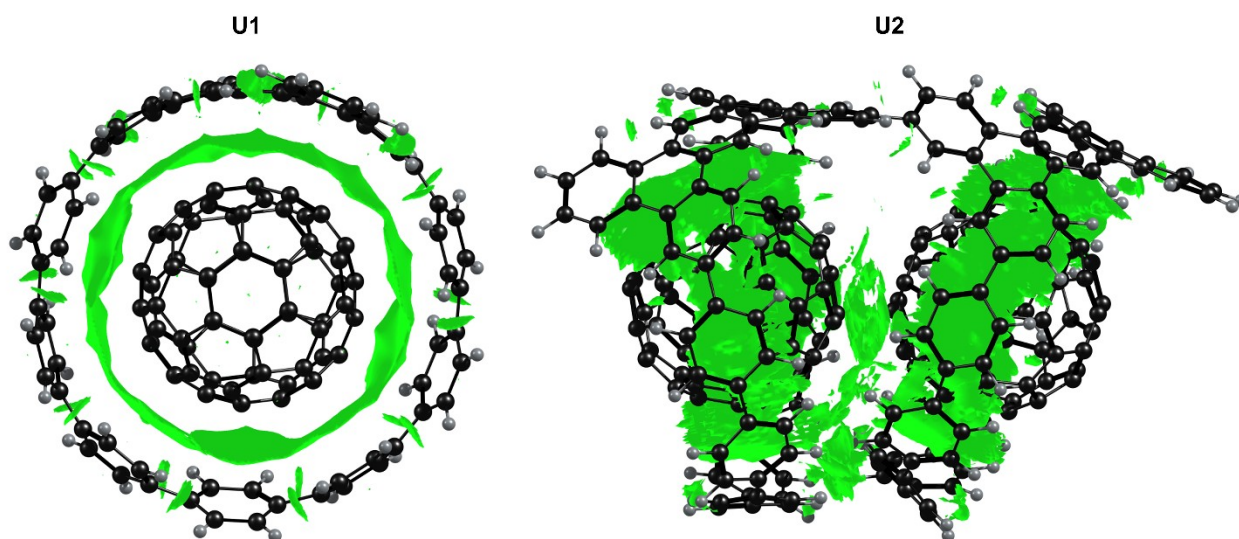

**Figure S8.** NCI isosurfaces of van der Waals interactions for **U1** and **U2** complexes. Isosurfaces were generated for  $\text{RDG} = 0.65$  a.u.

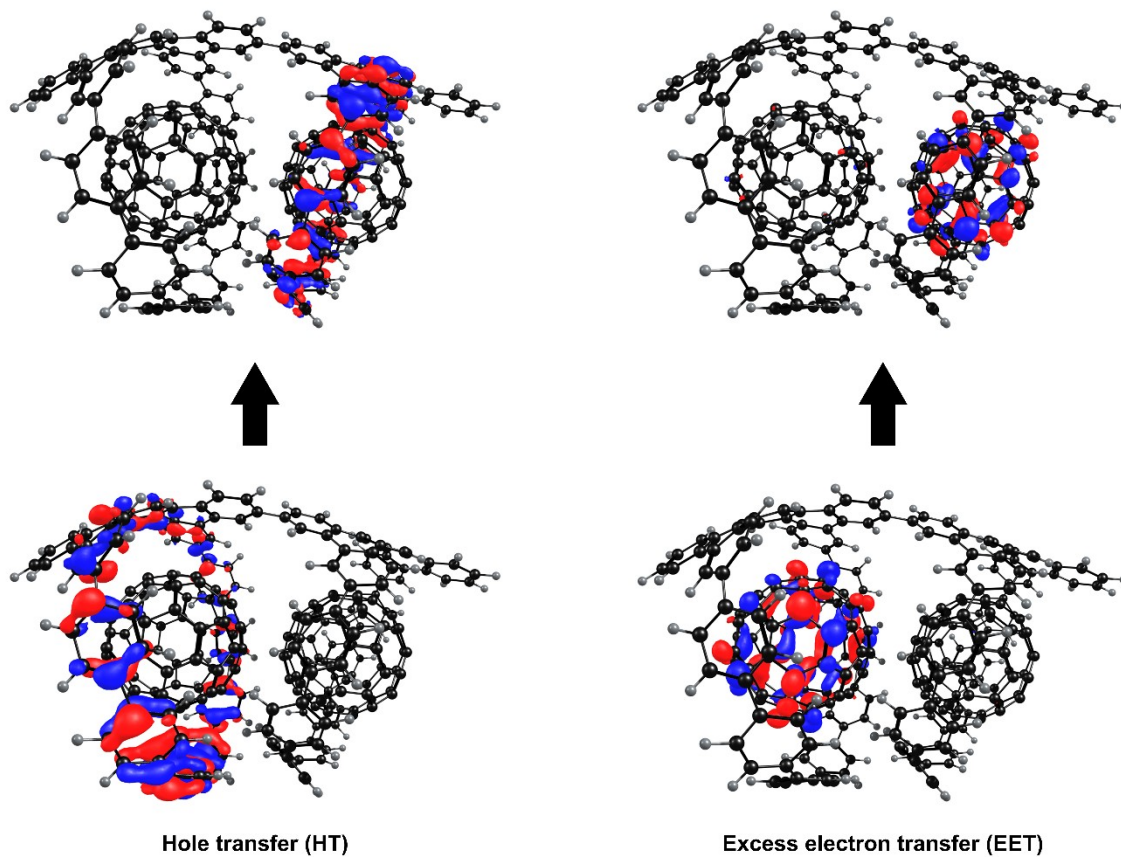

**Figure S9.** Molecular orbitals representing different states for simulation of hole transfer and excess electron transfer.

**Table S1.** Electronic coupling for hole transfer in a series of randomly selected *syn* and *anti* conformers of  $([10]CPP)_8$

| <i>Syn</i>                            |                      | <i>Anti</i>                           |                      |
|---------------------------------------|----------------------|---------------------------------------|----------------------|
| Structure                             | $V_{ij}$             | Structure                             | $V_{ij}$             |
| Syn1                                  | $2.67 \cdot 10^{-2}$ | Anti1                                 | $9.74 \cdot 10^{-3}$ |
| Syn2                                  | $2.84 \cdot 10^{-2}$ | Anti2                                 | $2.14 \cdot 10^{-2}$ |
| Syn3                                  | $4.34 \cdot 10^{-2}$ | Anti3                                 | $8.19 \cdot 10^{-3}$ |
| Syn4                                  | $2.39 \cdot 10^{-2}$ | Anti4                                 | $1.65 \cdot 10^{-2}$ |
| Syn5                                  | $2.41 \cdot 10^{-2}$ | Anti5                                 | $1.96 \cdot 10^{-2}$ |
| Syn6                                  | $3.16 \cdot 10^{-2}$ | Anti6                                 | $2.09 \cdot 10^{-2}$ |
| Syn7                                  | $2.26 \cdot 10^{-2}$ | Anti7                                 | $1.34 \cdot 10^{-2}$ |
| Syn8                                  | $2.99 \cdot 10^{-2}$ | Anti8                                 | $1.19 \cdot 10^{-2}$ |
| Syn9                                  | $2.68 \cdot 10^{-2}$ | Anti9                                 | $8.75 \cdot 10^{-3}$ |
| Syn10                                 | $5.67 \cdot 10^{-2}$ | Anti10                                | $2.25 \cdot 10^{-2}$ |
| Average $V_{ij} = 3.14 \cdot 10^{-2}$ |                      | Average $V_{ij} = 1.53 \cdot 10^{-2}$ |                      |

**Table S2.** Interaction energies computed for **U1** and **U2** complexes using different partitioning schemes.

| Complexes                                                                                                                                     |                                             |
|-----------------------------------------------------------------------------------------------------------------------------------------------|---------------------------------------------|
| Fragment                                                                                                                                      | $E_{\text{BOND}}/E_{\text{int}}$ , kcal/mol |
| U1 complex                                                                                                                                    |                                             |
| $[10]CPP\_Fused \supset C_{60}$                                                                                                               | -29477.49                                   |
| $[10]CPP\_Fused$                                                                                                                              | -17809.60                                   |
| C60                                                                                                                                           | -11576.94                                   |
| $E_{\text{int}}^{\text{TOTAL}} = E_{\text{int}}^{[10]CPP\_Fused \supset C_{60}} - (E_{[10]CPP\_Fused} + E_{C_{60}})$                          | -60.95                                      |
| U2 complex                                                                                                                                    |                                             |
| $([10]CPP\_Fused \supset C_{60})_2$                                                                                                           | -58760.02                                   |
| $([10]CPP\_Fused)_2 \supset C_{60}^1$                                                                                                         | -47108.52                                   |
| $([10]CPP\_Fused)_2 \supset C_{60}^2$                                                                                                         | -47104.78                                   |
| $C_{60}^1 + C_{60}^2$                                                                                                                         | -23161.08                                   |
| $([10]CPP\_Fused)_2$                                                                                                                          | -35460.45                                   |
| $C_{60}^1$                                                                                                                                    | -11576.91                                   |
| $C_{60}^2$                                                                                                                                    | -11576.81                                   |
| Type 1: $E_{\text{int}}^{([10]CPP\_Fused)_2 \cdots C_{60}^1}$                                                                                 | -71.16                                      |
| Type 1: $E_{\text{int}}^{([10]CPP\_Fused)_2 \cdots C_{60}^2}$                                                                                 | -67.52                                      |
| Type 2: $E_{\text{int}}^{([10]CPP\_Fused)_2 \supset C_{60}^1 \cdots C_{60}^2}$                                                                | -74.69                                      |
| Type 2: $E_{\text{int}}^{([10]CPP\_Fused)_2 \supset C_{60}^2 \cdots C_{60}^1}$                                                                | -78.33                                      |
| Type 3: $E_{\text{int}}^{C_{60}^1 \cdots C_{60}^2}$                                                                                           | -7.36                                       |
| $E_{\text{int}}^{\text{TOTAL}} = E_{\text{int}}^{([10]CPP\_Fused \supset C_{60})_2} - (E_{([10]CPP\_Fused)_2} + E_{C_{60}^1} + E_{C_{60}^2})$ | -145.85                                     |

**Table S3.** Charge separation (in electrons) between the fragments in electronic ground state for **U1** and **U2** complexes.  $Q_{[10]CPP\_Fused}$  /  $Q_{([10]CPP\_Fused \rightarrow C_{60})_2}$  - charge on host, and  $Q_{C_{60}}$  - charge on fullerene moiety. Total charge of the complexes  $Q_{Tot} = 0$ .

|                                             | Mulliken   | Löwdin | Hirshfeld | CM5    |
|---------------------------------------------|------------|--------|-----------|--------|
|                                             | U1 complex |        |           |        |
| $Q_{[10]CPP\_Fused}$                        | 0.023      | 0.016  | -0.077    | -0.068 |
| $Q_{C_{60}}$                                | -0.023     | -0.016 | 0.078     | 0.068  |
|                                             | U2 complex |        |           |        |
| $Q_{([10]CPP\_Fused \rightarrow C_{60})_2}$ | 0.033      | 0.007  | 0.101     | 0.133  |
| $Q_{C_{60}^1}$                              | -0.016     | -0.001 | -0.033    | -0.050 |
| $Q_{C_{60}^2}$                              | -0.017     | -0.006 | -0.067    | -0.083 |

**Table S4.** Parameters (electron density [ $\rho(r)$ ], its Laplacian [ $\nabla^2\rho(r)$ ], potential energy density [ $V(r)$ ], kinetic energy density [ $G(r)$ ], and total electron energy density [ $H(r)$ ] for selected bond critical points related to non-covalent interactions in **U1** and **U2** complexes computed in the gas phase.

| Bond critical points between fragments | Interaction                      | $\rho(r)$ , au    | $\nabla^2\rho(r)$ , au | $V(r)$ , au | $G(r)$ , au | $H(r)$ , au |
|----------------------------------------|----------------------------------|-------------------|------------------------|-------------|-------------|-------------|
|                                        |                                  | <b>U1 complex</b> |                        |             |             |             |
| <b>[10]CPP_Fused...C<sub>60</sub></b>  | $\pi \cdots \pi$<br>$C \cdots C$ | 6.17E-03          | 1.66E-02               | -2.54E-03   | 3.34E-03    | 8.04E-04    |
|                                        |                                  | 5.06E-03          | 1.35E-02               | -2.18E-03   | 2.78E-03    | 6.05E-04    |
|                                        |                                  | 5.29E-03          | 1.43E-02               | -2.29E-03   | 2.93E-03    | 6.39E-04    |
|                                        |                                  | 7.29E-03          | 2.08E-02               | -3.06E-03   | 4.13E-03    | 1.07E-03    |
|                                        |                                  | 5.61E-03          | 1.45E-02               | -2.38E-03   | 3.01E-03    | 6.28E-04    |
|                                        |                                  | 5.79E-03          | 1.54E-02               | -2.43E-03   | 3.15E-03    | 7.16E-04    |
|                                        |                                  | 6.69E-03          | 1.95E-02               | -2.91E-03   | 3.89E-03    | 9.85E-04    |
|                                        |                                  | 6.86E-03          | 2.00E-02               | -3.02E-03   | 4.02E-03    | 9.94E-04    |
|                                        |                                  | 7.77E-03          | 2.25E-02               | -3.32E-03   | 4.48E-03    | 1.16E-03    |
|                                        |                                  | 6.73E-03          | 1.90E-02               | -2.95E-03   | 3.86E-03    | 9.02E-04    |
|                                        |                                  | 6.68E-03          | 1.99E-02               | -2.99E-03   | 3.98E-03    | 9.94E-04    |
|                                        |                                  | 7.21E-03          | 2.00E-02               | -2.93E-03   | 3.97E-03    | 1.04E-03    |
|                                        |                                  | 6.52E-03          | 1.79E-02               | -2.70E-03   | 3.58E-03    | 8.84E-04    |
|                                        |                                  | 5.22E-03          | 1.40E-02               | -2.24E-03   | 2.87E-03    | 6.27E-04    |
|                                        |                                  | 5.66E-03          | 1.57E-02               | -2.44E-03   | 3.18E-03    | 7.47E-04    |
|                                        |                                  | 7.02E-03          | 1.94E-02               | -2.88E-03   | 3.87E-03    | 9.90E-04    |
|                                        |                                  | 7.47E-03          | 2.08E-02               | -3.04E-03   | 4.12E-03    | 1.08E-03    |
| 5.62E-03                               | 1.50E-02                         | -2.30E-03         | 3.02E-03               | 7.28E-04    |             |             |
| 6.00E-03                               | 1.57E-02                         | -2.41E-03         | 3.17E-03               | 7.61E-04    |             |             |
| 6.35E-03                               | 1.68E-02                         | -2.50E-03         | 3.35E-03               | 8.45E-04    |             |             |
|                                        |                                  | <b>U2 complex</b> |                        |             |             |             |



|                                                                        |                                  |           |          |           |          |          |
|------------------------------------------------------------------------|----------------------------------|-----------|----------|-----------|----------|----------|
| <b>Intraunit_1<br/>interactions<br/>[10]CPP_Fused...C<sub>60</sub></b> | $\pi \cdots \pi$<br>$C \cdots C$ | 5.48E-03  | 1.45E-02 | -2.23E-03 | 2.93E-03 | 6.95E-04 |
|                                                                        |                                  | 5.21E-03  | 1.46E-02 | -2.15E-03 | 2.90E-03 | 7.47E-04 |
|                                                                        |                                  | 6.58E-03  | 1.88E-02 | -2.85E-03 | 3.77E-03 | 9.24E-04 |
|                                                                        |                                  | 6.98E-03  | 2.00E-02 | -3.01E-03 | 4.01E-03 | 9.98E-04 |
|                                                                        |                                  | 8.38E-03  | 2.53E-02 | -3.74E-03 | 5.03E-03 | 1.29E-03 |
|                                                                        |                                  | 8.11E-03  | 2.38E-02 | -3.63E-03 | 4.78E-03 | 1.16E-03 |
|                                                                        |                                  | 7.34E-03  | 2.06E-02 | -3.04E-03 | 4.09E-03 | 1.06E-03 |
|                                                                        |                                  | 5.08E-03  | 1.28E-02 | -2.05E-03 | 2.62E-03 | 5.72E-04 |
|                                                                        |                                  | 5.88E-03  | 1.62E-02 | -2.52E-03 | 3.28E-03 | 7.68E-04 |
|                                                                        |                                  | 7.81E-03  | 2.32E-02 | -3.49E-03 | 4.65E-03 | 1.16E-03 |
|                                                                        |                                  | 6.49E-03  | 1.85E-02 | -2.80E-03 | 3.71E-03 | 9.14E-04 |
|                                                                        |                                  | 5.31E-03  | 1.43E-02 | -2.26E-03 | 2.92E-03 | 6.52E-04 |
|                                                                        |                                  | 5.09E-03  | 1.30E-02 | -2.08E-03 | 2.67E-03 | 5.85E-04 |
|                                                                        |                                  | 5.38E-03  | 1.32E-02 | -2.06E-03 | 2.68E-03 | 6.19E-04 |
|                                                                        |                                  | 5.06E-03  | 1.30E-02 | -2.07E-03 | 2.66E-03 | 5.89E-04 |
|                                                                        |                                  | 4.99E-03  | 1.30E-02 | -2.09E-03 | 2.67E-03 | 5.79E-04 |
|                                                                        |                                  | 9.00E-03  | 2.65E-02 | -3.84E-03 | 5.23E-03 | 1.39E-03 |
| <b>Intraunit_2<br/>interactions<br/>[10]CPP_Fused...C<sub>60</sub></b> | $\pi \cdots \pi$<br>$C \cdots C$ | 4.71E-03  | 1.21E-02 | -2.02E-03 | 2.51E-03 | 4.99E-04 |
|                                                                        |                                  | 8.83E-03  | 2.58E-02 | -3.76E-03 | 5.11E-03 | 1.34E-03 |
|                                                                        |                                  | 6.01E-03  | 1.66E-02 | -2.54E-03 | 3.34E-03 | 8.03E-04 |
|                                                                        |                                  | 6.32E-03  | 1.76E-02 | -2.67E-03 | 3.54E-03 | 8.70E-04 |
|                                                                        |                                  | 9.48E-03  | 2.82E-02 | -4.08E-03 | 5.56E-03 | 1.49E-03 |
|                                                                        |                                  | 8.46E-03  | 2.51E-02 | -3.67E-03 | 4.98E-03 | 1.30E-03 |
|                                                                        |                                  | 7.44E-03  | 2.26E-02 | -3.35E-03 | 4.49E-03 | 1.14E-03 |
|                                                                        |                                  | 7.53E-03  | 2.27E-02 | -3.37E-03 | 4.53E-03 | 1.16E-03 |
|                                                                        |                                  | 7.23E-03  | 2.03E-02 | -3.02E-03 | 4.05E-03 | 1.03E-03 |
|                                                                        |                                  | 6.58E-03  | 1.75E-02 | -2.62E-03 | 3.50E-03 | 8.81E-04 |
|                                                                        |                                  | 6.54E-03  | 1.79E-02 | -2.68E-03 | 3.58E-03 | 9.04E-04 |
|                                                                        |                                  | 5.35E-03  | 1.43E-02 | -2.27E-03 | 2.93E-03 | 6.54E-04 |
|                                                                        |                                  | 4.83E-03  | 1.32E-02 | -2.11E-03 | 2.70E-03 | 5.92E-04 |
|                                                                        |                                  | 4.96E-03  | 1.40E-02 | -2.17E-03 | 2.84E-03 | 6.67E-04 |
|                                                                        |                                  | 5.40E-03  | 1.45E-02 | -2.28E-03 | 2.95E-03 | 6.75E-04 |
|                                                                        |                                  | 6.42E-03  | 1.86E-02 | -2.67E-03 | 3.65E-03 | 9.87E-04 |
|                                                                        |                                  | 4.81E-03  | 1.35E-02 | -2.11E-03 | 2.73E-03 | 6.28E-04 |
| <b>Interunit<br/>interactions</b>                                      | $\pi \cdots \pi$<br>$C \cdots C$ | 1.19E-02  | 3.76E-02 | -5.67E-03 | 7.54E-03 | 1.87E-03 |
|                                                                        |                                  | 7.57E-03  | 2.29E-02 | -3.23E-03 | 4.48E-03 | 1.25E-03 |
|                                                                        |                                  | 7.57E-03  | 2.29E-02 | -3.23E-03 | 4.48E-03 | 1.25E-03 |
|                                                                        | $CH \cdots \pi$<br>$H \cdots C$  | 3.53E-03  | 1.10E-02 | -1.40E-03 | 2.08E-03 | 6.71E-04 |
|                                                                        |                                  | 1.08E-02  | 3.05E-02 | -5.74E-03 | 6.68E-03 | 9.39E-04 |
|                                                                        |                                  | 4.85E-03  | 1.40E-02 | -2.07E-03 | 2.79E-03 | 7.18E-04 |
|                                                                        |                                  | 1.07E-02  | 3.01E-02 | -5.72E-03 | 6.63E-03 | 9.05E-04 |
|                                                                        |                                  | 9.44E-03  | 2.83E-02 | -4.72E-03 | 5.90E-03 | 1.17E-03 |
|                                                                        |                                  | 6.95E-03  | 2.14E-02 | -3.16E-03 | 4.25E-03 | 1.10E-03 |
|                                                                        |                                  | 5.14E-03  | 1.49E-02 | -2.23E-03 | 2.98E-03 | 7.50E-04 |
| 4.67E-03                                                               | 1.31E-02                         | -1.97E-03 | 2.62E-03 | 6.53E-04  |          |          |
| 4.39E-03                                                               | 1.35E-02                         | -1.70E-03 | 2.54E-03 | 8.44E-04  |          |          |

**Table S5.** Excitation energies ( $E_x$ , eV) and dipole moments in ground state ( $\mu_0$ , D), change in dipole moments between ground state and state of interest ( $\Delta\mu = \mu_i - \mu_0$ , D) and solvation energies ( $E_{solv}$ , eV) in DCM calculated for **U1** and **U2** complexes.

|             | Supramolecular host-guest systems                          |            |
|-------------|------------------------------------------------------------|------------|
|             | U1 complex                                                 | U2 complex |
|             | Ground state (GS)                                          |            |
| $E_x$       | 0.000                                                      | 0.000      |
| $\mu_0$     | 0.441                                                      | 0.846      |
| $E_{solv}$  | -0.492                                                     | -0.895     |
|             | LE <sup>Guest</sup> (Fullerene C <sub>60</sub> )           |            |
| $E_x$       | 2.503                                                      | 2.474      |
| $\Delta\mu$ | 0.22                                                       | 0.89       |
| $E_{solv}$  | -0.500                                                     | -0.894     |
|             | LE <sub>2</sub> (Host [10]CPP_Fused)                       |            |
| $E_x$       | 3.335                                                      | 3.232      |
| $\Delta\mu$ | 0.15                                                       | 0.94       |
| $E_{solv}$  | -0.487                                                     | -0.887     |
|             | Most absorptive transition (Localized on [10]CPP_Fused)    |            |
| $E_x$       | 3.805                                                      | 3.834      |
| $\Delta\mu$ | 0.69                                                       | 1.14       |
| $E_{solv}$  | -0.489                                                     | -0.893     |
|             | CT1 Intraunit ([10]CPP_Fused → Fullerene C <sub>60</sub> ) |            |
| $E_x$       | 2.449                                                      | 2.429      |
| $\Delta\mu$ | 4.61                                                       | 5.86       |
| $E_{solv}$  | -0.784                                                     | -1.133     |
|             | CT2 Interunit ([10]CPP_Fused → Fullerene C <sub>60</sub> ) |            |
| $E_x$       | n/a                                                        | 2.578      |
| $\Delta\mu$ |                                                            | 32.65      |
| $E_{solv}$  |                                                            | -1.429     |

**Table S6.** Computed semi-classical rates ( $k_x$  in  $s^{-1}$ ) and characteristic times ( $\tau$  in ns) for the charge separation processes in U1 and U2, complexes in DCM solution using different effective Huang-Rhys factors.

| $\hbar\omega_{eff}$                                       | $\Delta G^0$ , eV | $ V $ , eV           | $\lambda_s$ | $\lambda_i$ | $S_{eff}$ | $k_x$ , $s^{-1}$  | $\tau$ , ns |
|-----------------------------------------------------------|-------------------|----------------------|-------------|-------------|-----------|-------------------|-------------|
| <b>U1 complex (LE<sub>1</sub> (C<sub>60</sub>) → CT1)</b> |                   |                      |             |             |           |                   |             |
| 1200                                                      | -0.054            | $1.92 \cdot 10^{-4}$ | 0.200       | 0.161       | 1.344     | $7.83 \cdot 10^8$ | 1.28        |
| 1400                                                      |                   |                      |             |             | 1.152     | $7.78 \cdot 10^8$ | 1.29        |
| 1600                                                      |                   |                      |             |             | 1.008     | $7.75 \cdot 10^8$ | 1.29        |
| 1800                                                      |                   |                      |             |             | 0.896     | $7.73 \cdot 10^8$ | 1.29        |
| 2000                                                      |                   |                      |             |             | 0.807     | $7.73 \cdot 10^8$ | 1.29        |
| <b>U2 complex (LE<sub>1</sub> (C<sub>60</sub>) → CT1)</b> |                   |                      |             |             |           |                   |             |
| 1200                                                      | -0.045            | $5.39 \cdot 10^{-4}$ | 0.198       | 0.150       | 1.331     | $6.23 \cdot 10^9$ | 0.16        |
| 1400                                                      |                   |                      |             |             | 1.141     | $6.19 \cdot 10^9$ | 0.16        |
| 1600                                                      |                   |                      |             |             | 0.998     | $6.18 \cdot 10^9$ | 0.16        |
| 1800                                                      |                   |                      |             |             | 0.887     | $6.17 \cdot 10^9$ | 0.16        |
| 2000                                                      |                   |                      |             |             | 0.799     | $6.17 \cdot 10^9$ | 0.16        |
| <b>U2 complex (LE<sub>1</sub> (C<sub>60</sub>) → CT2)</b> |                   |                      |             |             |           |                   |             |
| 1200                                                      | 0.104             | $2.44 \cdot 10^{-3}$ | 0.210       | 0.288       | 1.411     | $1.04 \cdot 10^9$ | 0.96        |
| 1400                                                      |                   |                      |             |             | 1.210     | $1.04 \cdot 10^9$ | 0.96        |
| 1600                                                      |                   |                      |             |             | 1.059     | $1.04 \cdot 10^9$ | 0.96        |
| 1800                                                      |                   |                      |             |             | 0.941     | $1.04 \cdot 10^9$ | 0.96        |
| 2000                                                      |                   |                      |             |             | 0.847     | $1.04 \cdot 10^9$ | 0.96        |

## Cartesian coordinates (in Å)

Cartesian coordinates for **U1** and **U2** complexes.

### [10]CPP\_Fused $\supset$ C<sub>60</sub> (U1 complex)

Gas-phase. BLYP-D3(BJ)/def2-SVP

| Atom | X            | Y            | Z            |
|------|--------------|--------------|--------------|
| 6    | 4.667369000  | -5.437610000 | 1.249891000  |
| 6    | 5.639122000  | -4.432595000 | 1.185453000  |
| 6    | 5.855972000  | -3.697878000 | -0.008949000 |
| 6    | 5.178811000  | -4.141080000 | -1.173683000 |
| 6    | 4.211247000  | -5.148377000 | -1.110568000 |
| 6    | 3.869721000  | -5.759352000 | 0.121706000  |
| 1    | 4.485207000  | -5.947286000 | 2.206200000  |
| 1    | 6.202272000  | -4.173645000 | 2.092696000  |
| 1    | 5.312139000  | -3.599229000 | -2.118639000 |
| 1    | 3.615266000  | -5.364113000 | -2.006845000 |
| 6    | 6.515199000  | -2.368867000 | -0.013565000 |
| 6    | 6.427718000  | -1.543437000 | 1.135547000  |
| 6    | 6.991889000  | -1.768524000 | -1.208058000 |
| 6    | 6.624735000  | -0.161038000 | 1.050624000  |
| 1    | 6.058883000  | -1.963718000 | 2.080039000  |
| 6    | 7.184463000  | -0.385382000 | -1.294606000 |
| 1    | 7.156501000  | -2.388652000 | -2.100030000 |
| 6    | 6.914332000  | 0.461619000  | -0.188911000 |
| 1    | 6.403682000  | 0.458383000  | 1.929865000  |
| 1    | 7.494122000  | 0.055421000  | -2.252495000 |
| 6    | 2.573613000  | -6.469977000 | 0.243363000  |
| 6    | 1.951267000  | -7.100568000 | -0.865131000 |
| 6    | 1.796962000  | -6.304105000 | 1.416974000  |
| 6    | 0.579901000  | -7.378064000 | -0.861577000 |
| 1    | 2.542155000  | -7.324416000 | -1.764133000 |
| 6    | 0.426475000  | -6.581727000 | 1.420300000  |
| 1    | 2.238079000  | -5.816841000 | 2.296027000  |
| 1    | 0.118487000  | -7.814250000 | -1.758489000 |
| 1    | -0.163806000 | -6.305212000 | 2.302869000  |
| 6    | 6.644976000  | 1.911235000  | -0.350780000 |
| 6    | 6.010609000  | 2.363031000  | -1.535325000 |
| 6    | 6.735480000  | 2.825476000  | 0.729606000  |
| 6    | 5.344129000  | 3.591279000  | -1.574067000 |
| 1    | 5.915271000  | 1.683274000  | -2.391714000 |
| 6    | 6.072049000  | 4.057516000  | 0.689228000  |
| 1    | 7.287413000  | 2.540902000  | 1.636422000  |
| 6    | 5.284563000  | 4.427861000  | -0.431130000 |
| 1    | 4.744179000  | 3.837998000  | -2.459500000 |
| 1    | 6.116109000  | 4.719991000  | 1.564892000  |
| 6    | 4.220554000  | 5.457659000  | -0.345618000 |
| 6    | 3.539141000  | 5.646558000  | 0.882394000  |
| 6    | 3.661326000  | 6.066011000  | -1.499017000 |
| 6    | 2.276913000  | 6.246704000  | 0.923799000  |
| 1    | 3.935311000  | 5.189225000  | 1.798358000  |
| 6    | 2.398292000  | 6.667422000  | -1.457485000 |
| 1    | 4.199598000  | 6.013774000  | -2.455559000 |

### ([10]CPP\_Fused $\supset$ C<sub>60</sub>)<sub>2</sub> (U2 complex)

Gas-phase. BLYP-D3(BJ)/def2-SVP

| Atom | X            | Y            | Z            |
|------|--------------|--------------|--------------|
| 6    | 3.683506623  | 4.446001660  | -4.220438223 |
| 6    | 3.922706623  | 5.109026660  | -3.011951223 |
| 6    | 3.099510623  | 4.883438660  | -1.877656223 |
| 6    | 1.921019623  | 4.121726660  | -2.077658223 |
| 6    | 1.676416623  | 3.464831660  | -3.286293223 |
| 6    | 2.606382623  | 3.532238660  | -4.355385223 |
| 1    | 10.659494623 | -6.565269340 | -2.659486223 |
| 1    | 4.377184623  | 4.595063660  | -5.059632223 |
| 1    | 4.797556623  | 5.768348660  | -2.930099223 |
| 1    | 1.245385623  | 3.928234660  | -1.237768223 |
| 1    | 0.819490623  | 2.781486660  | -3.345196223 |
| 6    | 3.551957623  | 5.183815660  | -0.497462223 |
| 6    | 4.939082623  | 5.245803660  | -0.203857223 |
| 6    | 2.661907623  | 5.161362660  | 0.607141777  |
| 6    | 5.413450623  | 5.117306660  | 1.104853777  |
| 1    | 5.667830623  | 5.287506660  | -1.023560223 |
| 6    | 3.138484623  | 5.017065660  | 1.914339777  |
| 1    | 1.576113623  | 5.172216660  | 0.442534777  |
| 6    | 4.527135623  | 4.899535660  | 2.190369777  |
| 1    | 6.498186623  | 5.099613660  | 1.273202777  |
| 1    | 2.405745623  | 4.891547660  | 2.719166777  |
| 6    | 2.591725623  | 2.481741660  | -5.402067223 |
| 6    | 1.409569623  | 1.783735660  | -5.762049223 |
| 6    | 3.820704623  | 1.956499660  | -5.874907223 |
| 6    | 1.472596623  | 0.537080660  | -6.393169223 |
| 1    | 0.429080623  | 2.197798660  | -5.488659223 |
| 6    | 3.882885623  | 0.705306660  | -6.497728223 |
| 1    | 4.760127623  | 2.465079660  | -5.623373223 |
| 1    | 0.536588623  | 0.003592660  | -6.607150223 |
| 1    | 4.870255623  | 0.276414660  | -6.711153223 |
| 6    | 4.990325623  | 4.293458660  | 3.463175777  |
| 6    | 4.158077623  | 4.211950660  | 4.608146777  |
| 6    | 6.177826623  | 3.517944660  | 3.485661777  |
| 6    | 4.366280623  | 3.245860660  | 5.597649777  |
| 1    | 3.284701623  | 4.865283660  | 4.691631777  |
| 6    | 6.397303623  | 2.562460660  | 4.480355777  |
| 1    | 6.876019623  | 3.555435660  | 2.641141777  |
| 6    | 5.438549623  | 2.322888660  | 5.499562777  |
| 1    | 3.640496623  | 3.165449660  | 6.417319777  |
| 1    | 7.261536623  | 1.896540660  | 4.375010777  |
| 6    | 5.435334623  | 1.021232660  | 6.210172777  |
| 6    | 6.592349623  | 0.203558660  | 6.260859777  |
| 6    | 4.211466623  | 0.432097660  | 6.626796777  |
| 6    | 6.499805623  | -1.166442340 | 6.517822777  |
| 1    | 7.573672623  | 0.628851660  | 6.012852777  |
| 6    | 4.123672623  | -0.937239340 | 6.905686777  |

|   |              |              |              |   |             |              |              |
|---|--------------|--------------|--------------|---|-------------|--------------|--------------|
| 6 | 1.636239000  | 6.689161000  | -0.260676000 | 1 | 3.290867623 | 1.030412660  | 6.636863777  |
| 1 | 1.723396000  | 6.242787000  | 1.871472000  | 6 | 5.248041623 | -1.789975340 | 6.761701777  |
| 1 | 1.969379000  | 7.077850000  | -2.382103000 | 1 | 7.405427623 | -1.778950340 | 6.422548777  |
| 6 | 0.165658000  | 6.883644000  | -0.261764000 | 1 | 3.144278623 | -1.361066340 | 7.162356777  |
| 6 | -0.589549000 | 6.467605000  | -1.387528000 | 6 | 5.113615623 | -3.256340340 | 6.583353777  |
| 6 | -0.552210000 | 7.221050000  | 0.914483000  | 6 | 3.901805623 | -3.808259340 | 6.095962777  |
| 6 | -1.963907000 | 6.231516000  | -1.289010000 | 6 | 6.239585623 | -4.121127340 | 6.619707777  |
| 1 | -0.073060000 | 6.192677000  | -2.315853000 | 6 | 3.877859623 | -5.059948340 | 5.472052777  |
| 6 | -1.927079000 | 6.980513000  | 1.015369000  | 1 | 2.989751623 | -3.198050340 | 6.073613777  |
| 1 | -0.013348000 | 7.624829000  | 1.782771000  | 6 | 6.214232623 | -5.371566340 | 5.995680777  |
| 6 | -2.647631000 | 6.398024000  | -0.058476000 | 1 | 7.173684623 | -3.781347340 | 7.086943777  |
| 1 | -2.485594000 | 5.777314000  | -2.141480000 | 6 | 5.060879623 | -5.826536340 | 5.303158777  |
| 1 | -2.443617000 | 7.196993000  | 1.960957000  | 1 | 2.944565623 | -5.377655340 | 4.992395777  |
| 6 | -3.950262000 | 5.718392000  | 0.137696000  | 1 | 7.130072623 | -5.977301340 | 5.992589777  |
| 6 | -4.200879000 | 5.045965000  | 1.359716000  | 6 | 5.140254623 | -6.873608340 | 4.252945777  |
| 6 | -4.847158000 | 5.472182000  | -0.932470000 | 6 | 6.390230623 | -7.224418340 | 3.673980777  |
| 6 | -5.162877000 | 4.036101000  | 1.442466000  | 6 | 3.981038623 | -7.387069340 | 3.617486777  |
| 1 | -3.535418000 | 5.211997000  | 2.216804000  | 6 | 6.470122623 | -7.910144340 | 2.458070777  |
| 6 | -5.816995000 | 4.467336000  | -0.844451000 | 1 | 7.322808623 | -6.877682340 | 4.136446777  |
| 1 | -4.741330000 | 6.035729000  | -1.869974000 | 6 | 4.059345623 | -8.050481340 | 2.389332777  |
| 6 | -5.928388000 | 3.650671000  | 0.311587000  | 1 | 2.989048623 | -7.196704340 | 4.046675777  |
| 1 | -5.217032000 | 3.450444000  | 2.367799000  | 6 | 5.302501623 | -8.263101340 | 1.736487777  |
| 1 | -6.452465000 | 4.270979000  | -1.718072000 | 1 | 7.460853623 | -8.107677340 | 2.026891777  |
| 6 | -6.568062000 | 2.310264000  | 0.267730000  | 1 | 3.124717623 | -8.319910340 | 1.881148777  |
| 6 | -6.782132000 | 1.659675000  | -0.981300000 | 6 | 5.327881623 | -8.574441340 | 0.285034777  |
| 6 | -6.736481000 | 1.533074000  | 1.429632000  | 6 | 4.192078623 | -9.123521340 | -0.378679223 |
| 6 | -6.942376000 | 0.279784000  | -1.047938000 | 6 | 6.371223623 | -8.086038340 | -0.525287223 |
| 1 | -6.709735000 | 2.225207000  | -1.918211000 | 6 | 4.016220623 | -8.933553340 | -1.745152223 |
| 6 | -6.902382000 | 0.128933000  | 1.388648000  | 1 | 3.411747623 | -9.636089340 | 0.199310777  |
| 1 | -6.635267000 | 2.014887000  | 2.407524000  | 6 | 6.230284623 | -7.915422340 | -1.925290223 |
| 6 | -6.891667000 | -0.531282000 | 0.117483000  | 1 | 7.262599623 | -7.673495340 | -0.042467223 |
| 1 | -7.015373000 | -0.187697000 | -2.037200000 | 6 | 4.962397623 | -8.203711340 | -2.517939223 |
| 6 | -6.604566000 | -1.968095000 | 0.055181000  | 1 | 3.094038623 | -9.296726340 | -2.217138223 |
| 6 | -6.399436000 | -2.699050000 | 1.275379000  | 6 | 4.593941623 | -7.518628340 | -3.760679223 |
| 6 | -6.274419000 | -2.597436000 | -1.162643000 | 6 | 5.579230623 | -6.775353340 | -4.493960223 |
| 6 | -5.743557000 | -3.942388000 | 1.209934000  | 6 | 3.233417623 | -7.308130340 | -4.062491223 |
| 6 | -5.597657000 | -3.829785000 | -1.226938000 | 6 | 5.139714623 | -5.859198340 | -5.471562223 |
| 1 | -6.409102000 | -2.040257000 | -2.093605000 | 6 | 2.792728623 | -6.313357340 | -4.954552223 |
| 6 | -5.263754000 | -4.493801000 | 0.002597000  | 1 | 2.485684623 | -7.806499340 | -3.440197223 |
| 1 | -5.475492000 | -4.429430000 | 2.151964000  | 6 | 3.775651623 | -5.554358340 | -5.678184223 |
| 6 | -4.238852000 | -5.543323000 | 0.003094000  | 1 | 5.888726623 | -5.222420340 | -5.951673223 |
| 6 | -3.504453000 | -5.798732000 | -1.198485000 | 6 | 3.374549623 | -4.314449340 | -6.354646223 |
| 6 | -3.784683000 | -6.160563000 | 1.202303000  | 6 | 2.075645623 | -3.771854340 | -6.091681223 |
| 6 | -2.239265000 | -6.424968000 | -1.098284000 | 6 | 4.293904623 | -3.506999340 | -7.080954223 |
| 6 | -2.551265000 | -6.801884000 | 1.270356000  | 6 | 1.859065623 | -2.394763340 | -6.326829223 |
| 1 | -4.383083000 | -6.076448000 | 2.118043000  | 6 | 4.037968623 | -2.163170340 | -7.342835223 |
| 6 | -1.699451000 | -6.847357000 | 0.130271000  | 1 | 5.254929623 | -3.932862340 | -7.397321223 |
| 1 | -1.596404000 | -6.442930000 | -1.984549000 | 6 | 2.843379623 | -1.548743340 | -6.867485223 |
| 1 | -2.207281000 | -7.214091000 | 2.228595000  | 1 | 0.937234623 | -1.944385340 | -5.947948223 |
| 6 | -0.232356000 | -7.034896000 | 0.249517000  | 1 | 4.795722623 | -1.563401340 | -7.864467223 |
| 6 | -5.075597000 | -4.342416000 | -2.501811000 | 6 | 2.718824623 | -0.080927340 | -6.681822223 |
| 6 | -4.006814000 | -5.294399000 | -2.485314000 | 6 | 1.382988623 | -5.905577340 | -4.974017223 |
| 6 | -5.557387000 | -3.876023000 | -3.753713000 | 6 | 1.037122623 | -4.610190340 | -5.472219223 |

|   |              |              |              |   |              |              |              |
|---|--------------|--------------|--------------|---|--------------|--------------|--------------|
| 6 | -3.455095000 | -5.723984000 | -3.721573000 | 6 | 0.358616623  | -6.705195340 | -4.399711223 |
| 6 | -4.997748000 | -4.310556000 | -4.957943000 | 6 | -0.295939377 | -4.152076340 | -5.318220223 |
| 6 | -3.934400000 | -5.239883000 | -4.941591000 | 6 | -0.939047377 | -6.225906340 | -4.240801223 |
| 1 | -6.397965000 | -3.170812000 | -3.780006000 | 6 | -1.284132377 | -4.917643340 | -4.677690223 |
| 1 | -2.651116000 | -6.470683000 | -3.723792000 | 1 | 0.589265623  | -7.725494340 | -4.068365223 |
| 1 | -5.394429000 | -3.939121000 | -5.913660000 | 1 | -0.567127377 | -3.150421340 | -5.671091223 |
| 1 | -3.493347000 | -5.594084000 | -5.884285000 | 1 | -1.708368377 | -6.867458340 | -3.789518223 |
| 6 | -6.752680000 | -2.082158000 | 2.562155000  | 6 | 6.982556623  | -6.806314340 | -4.052549223 |
| 6 | -6.841537000 | -2.842283000 | 3.758658000  | 6 | 8.028744623  | -6.250836340 | -4.834646223 |
| 6 | -6.988269000 | -0.670974000 | 2.621299000  | 6 | 7.291390623  | -7.310897340 | -2.746122223 |
| 6 | -7.141403000 | -2.240574000 | 4.983583000  | 6 | 9.335306623  | -6.159239340 | -4.347408223 |
| 6 | -7.296450000 | -0.082030000 | 3.876364000  | 6 | 8.625206623  | -7.203481340 | -2.271480223 |
| 6 | -7.370495000 | -0.848159000 | 5.042880000  | 6 | 9.634448623  | -6.631743340 | -3.051042223 |
| 1 | -6.694719000 | -3.929337000 | 3.719103000  | 1 | 7.810582623  | -5.890395340 | -5.848135223 |
| 1 | -7.214869000 | -2.853536000 | 5.893343000  | 1 | 10.126471623 | -5.725000340 | -4.975180223 |
| 1 | -7.510020000 | 0.993048000  | 3.931345000  | 1 | 8.877826623  | -7.598059340 | -1.279366223 |
| 1 | -7.619474000 | -0.367829000 | 5.999983000  | 6 | 1.247610623  | -1.997667340 | -1.482991223 |
| 6 | -1.311646000 | 0.726493000  | -3.254497000 | 6 | 1.443713623  | -3.305232340 | -0.845793223 |
| 6 | -0.173256000 | 1.640494000  | -3.120495000 | 6 | 1.535843623  | -3.397589340 | 0.560193777  |
| 6 | 1.142796000  | 1.132645000  | -3.114030000 | 6 | 1.436983623  | -2.185663340 | 1.381300777  |
| 6 | 1.371686000  | -0.310055000 | -3.240226000 | 6 | 1.250808623  | -0.931837340 | 0.769370777  |
| 6 | 0.276587000  | -1.190353000 | -3.369828000 | 6 | 1.158950623  | -0.836752340 | -0.689349223 |
| 6 | -1.091203000 | -0.662207000 | -3.376886000 | 6 | 1.829767623  | 0.396985660  | -1.103540223 |
| 6 | -1.946424000 | -1.607892000 | -2.654288000 | 6 | 2.575542623  | 0.423576660  | -2.296003223 |
| 6 | -2.988112000 | -1.127475000 | -1.833819000 | 6 | 2.679622623  | -0.784549340 | -3.122520223 |
| 6 | -3.217864000 | 0.315502000  | -1.706457000 | 6 | 2.029330623  | -1.972942340 | -2.723844223 |
| 6 | -2.396749000 | 1.226193000  | -2.405322000 | 6 | 2.712455623  | -3.263495340 | -2.849894223 |
| 6 | -1.929433000 | 2.450786000  | -1.745442000 | 6 | 2.350364623  | -4.088227340 | -1.692235223 |
| 6 | -0.553742000 | 2.706033000  | -2.187757000 | 6 | 3.314182623  | -4.930851340 | -1.096774223 |
| 6 | 0.397191000  | 3.220099000  | -1.281656000 | 6 | 3.406927623  | -5.029501340 | 0.364310777  |
| 6 | 1.766859000  | 2.693890000  | -1.275218000 | 6 | 2.533307623  | -4.277025340 | 1.177506777  |
| 6 | 2.132605000  | 1.668876000  | -2.174095000 | 6 | 3.046758623  | -3.608287340 | 2.378120777  |
| 6 | 2.972733000  | 0.556262000  | -1.719064000 | 6 | 2.367127623  | -2.316626340 | 2.505124777  |
| 6 | 2.502501000  | -0.666792000 | -2.378579000 | 6 | 3.065190623  | -1.186268340 | 2.981140777  |
| 6 | 2.492795000  | -1.890176000 | -1.675961000 | 6 | 2.862401623  | 0.121707660  | 2.347222777  |
| 6 | 1.356278000  | -2.807266000 | -1.811016000 | 6 | 1.970837623  | 0.245328660  | 1.259760777  |
| 6 | 0.267921000  | -2.463091000 | -2.641918000 | 6 | 2.330280623  | 1.069279660  | 0.100119777  |
| 6 | -1.106469000 | -2.722364000 | -2.200150000 | 6 | 3.570021623  | 1.738432660  | 0.068635777  |
| 6 | -1.337790000 | -3.306610000 | -0.938752000 | 6 | 4.353974623  | 1.761544660  | -1.172489223 |
| 6 | -2.421401000 | -2.807959000 | -0.086173000 | 6 | 3.867488623  | 1.116721660  | -2.328440223 |
| 6 | -3.227141000 | -1.739523000 | -0.522976000 | 6 | 4.773066623  | 0.332500660  | -3.171288223 |
| 6 | -3.612849000 | -0.678522000 | 0.411712000  | 6 | 4.040899623  | -0.841620340 | -3.660491223 |
| 6 | -3.601935000 | 0.592811000  | -0.319008000 | 6 | 4.697765623  | -2.081504340 | -3.785507223 |
| 6 | -3.152114000 | 1.768088000  | 0.313677000  | 6 | 4.022887623  | -3.312657340 | -3.365650223 |
| 6 | -2.300210000 | 2.716080000  | -0.411266000 | 6 | 5.022089623  | -4.187354340 | -2.748108223 |
| 6 | -1.311710000 | 3.250590000  | 0.530668000  | 6 | 4.675664623  | -4.979076340 | -1.637206223 |
| 6 | 0.009567000  | 3.496768000  | 0.104728000  | 6 | 5.607233623  | -5.109634340 | -0.513494223 |
| 6 | 1.138924000  | 3.138191000  | 0.967520000  | 6 | 4.824294623  | -5.140004340 | 0.724444777  |
| 6 | 2.225644000  | 2.642070000  | 0.115611000  | 6 | 5.315165623  | -4.502374340 | 1.882143777  |
| 6 | 3.034247000  | 1.573163000  | 0.553008000  | 6 | 4.409021623  | -3.716412340 | 2.721852777  |
| 6 | 3.413114000  | 0.508717000  | -0.381034000 | 6 | 5.138757623  | -2.544073340 | 3.212979777  |
| 6 | 3.400681000  | -0.762792000 | 0.348225000  | 6 | 4.481614623  | -1.302625340 | 3.340354777  |
| 6 | 2.951691000  | -1.938597000 | -0.284540000 | 6 | 5.154227623  | -0.068549340 | 2.925465777  |

|   |              |              |              |   |              |              |              |
|---|--------------|--------------|--------------|---|--------------|--------------|--------------|
| 6 | 2.099673000  | -2.885789000 | 0.440760000  | 6 | 4.156016623  | 0.813080660  | 2.311333777  |
| 6 | 1.112138000  | -3.421222000 | -0.501536000 | 6 | 4.500749623  | 1.604262660  | 1.194569777  |
| 6 | -0.209122000 | -3.664948000 | -0.075329000 | 6 | 5.860389623  | 1.544580660  | 0.648776777  |
| 6 | -0.596802000 | -3.388133000 | 1.311274000  | 6 | 5.769842623  | 1.643131660  | -0.812330223 |
| 6 | -1.965888000 | -2.861412000 | 1.305261000  | 6 | 6.642545623  | 0.887816660  | -1.624928223 |
| 6 | -2.334917000 | -1.839414000 | 2.205774000  | 6 | 6.135738623  | 0.222557660  | -2.829365223 |
| 6 | -3.176741000 | -0.727388000 | 1.751149000  | 6 | 6.821394623  | -1.068832340 | -2.958651223 |
| 6 | -2.705396000 | 0.496121000  | 2.408953000  | 6 | 6.854229623  | -4.454086340 | -0.548508223 |
| 6 | 0.904519000  | 2.549474000  | 2.226438000  | 6 | 6.117675623  | -2.198577340 | -3.427484223 |
| 6 | -2.694555000 | 1.719109000  | 1.705333000  | 6 | 6.318437623  | -3.503157340 | -2.789542223 |
| 6 | -1.556913000 | 2.635271000  | 1.839323000  | 6 | 7.214395623  | -3.630989340 | -1.707624223 |
| 6 | -0.469429000 | 2.291270000  | 2.670054000  | 6 | 7.943712623  | -2.457443340 | -1.220137223 |
| 6 | -0.478162000 | 1.019327000  | 3.398733000  | 6 | 8.034786623  | -2.553551340 | 0.240148777  |
| 6 | 0.889485000  | 0.491397000  | 3.405579000  | 6 | 7.361778623  | -3.788586340 | 0.656093777  |
| 6 | 1.744666000  | 1.436037000  | 2.681648000  | 6 | 6.609308623  | -3.813352340 | 1.849269777  |
| 6 | 2.788958000  | 0.957527000  | 1.862551000  | 6 | 6.499467623  | -2.602982340 | 2.672679777  |
| 6 | 3.016239000  | -0.485508000 | 1.735180000  | 6 | 7.147159623  | -1.414886340 | 2.272201777  |
| 6 | 2.195404000  | -1.395748000 | 2.434028000  | 6 | 6.461435623  | -0.125273340 | 2.400542777  |
| 6 | 1.728941000  | -2.620767000 | 1.774848000  | 6 | 6.820472623  | 0.696531660  | 1.240251777  |
| 6 | 0.353703000  | -2.875865000 | 2.218155000  | 6 | 7.727824623  | -0.086262340 | 0.394826777  |
| 6 | -0.027952000 | -1.810997000 | 3.151166000  | 6 | 7.640215623  | 0.007312660  | -1.009841223 |
| 6 | -1.344567000 | -1.303262000 | 3.144824000  | 6 | 7.750274623  | -1.200877340 | -1.833420223 |
| 6 | -1.573743000 | 0.139473000  | 3.270547000  | 6 | 7.929639623  | -1.390718340 | 1.032106777  |
| 6 | 1.110107000  | -0.896838000 | 3.283836000  | 6 | -4.321324377 | 7.976373660  | -3.043830223 |
|   |              |              |              | 6 | -3.439785377 | 8.435199660  | -2.060694223 |
|   |              |              |              | 6 | -3.906371377 | 9.144177660  | -0.923748223 |
|   |              |              |              | 6 | -5.268445377 | 9.546911660  | -0.935636223 |
|   |              |              |              | 6 | -6.153117377 | 9.082276660  | -1.913855223 |
|   |              |              |              | 6 | -5.716177377 | 8.200002660  | -2.935815223 |
|   |              |              |              | 1 | -3.937844377 | 7.303971660  | -3.822694223 |
|   |              |              |              | 1 | -2.393018377 | 8.113196660  | -2.115295223 |
|   |              |              |              | 1 | -5.658967377 | 10.181011660 | -0.128626223 |
|   |              |              |              | 1 | -7.215609377 | 9.355975660  | -1.850155223 |
|   |              |              |              | 6 | -3.078658377 | 9.207197660  | 0.307330777  |
|   |              |              |              | 6 | -1.694772377 | 8.897197660  | 0.292299777  |
|   |              |              |              | 6 | -3.689369377 | 9.331992660  | 1.583266777  |
|   |              |              |              | 6 | -1.016320377 | 8.546369660  | 1.462961777  |
|   |              |              |              | 1 | -1.152440377 | 8.849394660  | -0.660676223 |
|   |              |              |              | 6 | -3.003792377 | 9.005709660  | 2.757227777  |
|   |              |              |              | 1 | -4.751496377 | 9.597122660  | 1.657723777  |
|   |              |              |              | 6 | -1.675399377 | 8.511583660  | 2.719920777  |
|   |              |              |              | 1 | 0.020873623  | 8.197886660  | 1.378583777  |
|   |              |              |              | 1 | -3.541049377 | 9.061972660  | 3.713111777  |
|   |              |              |              | 6 | -6.648307377 | 7.296888660  | -3.650620223 |
|   |              |              |              | 6 | -7.785535377 | 6.805493660  | -2.961362223 |
|   |              |              |              | 6 | -6.315534377 | 6.666387660  | -4.875999223 |
|   |              |              |              | 6 | -8.424804377 | 5.631809660  | -3.366021223 |
|   |              |              |              | 1 | -8.087357377 | 7.269030660  | -2.013347223 |
|   |              |              |              | 6 | -6.960699377 | 5.492606660  | -5.281653223 |
|   |              |              |              | 1 | -5.493935377 | 7.065317660  | -5.487228223 |
|   |              |              |              | 1 | -9.215097377 | 5.231628660  | -2.720668223 |
|   |              |              |              | 1 | -6.623254377 | 5.004799660  | -6.205082223 |
|   |              |              |              | 6 | -1.084608377 | 7.753098660  | 3.849915777  |

|   |               |              |              |
|---|---------------|--------------|--------------|
| 6 | -1.922252377  | 7.143332660  | 4.819749777  |
| 6 | 0.286156623   | 7.384592660  | 3.864062777  |
| 6 | -1.467855377  | 6.081677660  | 5.611384777  |
| 1 | -2.986691377  | 7.403869660  | 4.864037777  |
| 6 | 0.737166623   | 6.321602660  | 4.650664777  |
| 1 | 1.001023623   | 7.891627660  | 3.202812777  |
| 6 | -0.152837377  | 5.577853660  | 5.465711777  |
| 1 | -2.188487377  | 5.542121660  | 6.240736777  |
| 1 | 1.792107623   | 6.030401660  | 4.595596777  |
| 6 | 0.160736623   | 4.199560660  | 5.914420777  |
| 6 | 0.859791623   | 3.341211660  | 5.029261777  |
| 6 | -0.414023377  | 3.619062660  | 7.073042777  |
| 6 | 0.870236623   | 1.956512660  | 5.216005777  |
| 1 | 1.291669623   | 3.745646660  | 4.107840777  |
| 6 | -0.410387377  | 2.230635660  | 7.259114777  |
| 1 | -0.911183377  | 4.263802660  | 7.811592777  |
| 6 | 0.165006623   | 1.364697660  | 6.294205777  |
| 1 | 1.322625623   | 1.322112660  | 4.443184777  |
| 1 | -13.127950377 | 1.568183660  | -0.828820223 |
| 1 | -0.908730377  | 1.803695660  | 8.140766777  |
| 6 | -0.185380377  | -0.073921340 | 6.205439777  |
| 6 | -1.503109377  | -0.481415340 | 6.532733777  |
| 6 | 0.638503623   | -1.005962340 | 5.524022777  |
| 6 | -2.035629377  | -1.671290340 | 6.024010777  |
| 1 | -2.169849377  | 0.213877660  | 7.059615777  |
| 6 | 0.109296623   | -2.202306340 | 5.030293777  |
| 1 | 1.684580623   | -0.755896340 | 5.306313777  |
| 6 | -1.268909377  | -2.507184340 | 5.174690777  |
| 1 | -3.105975377  | -1.873844340 | 6.162592777  |
| 1 | 0.755896623   | -2.868494340 | 4.445268777  |
| 6 | -1.963054377  | -3.420648340 | 4.235426777  |
| 6 | -1.493670377  | -3.486683340 | 2.899378777  |
| 6 | -3.224595377  | -4.004796340 | 4.509819777  |
| 6 | -2.309693377  | -3.949316340 | 1.866944777  |
| 1 | -0.526818377  | -3.042076340 | 2.640079777  |
| 6 | -4.042116377  | -4.472344340 | 3.472745777  |
| 1 | -3.595803377  | -4.039501340 | 5.543854777  |
| 6 | -3.640557377  | -4.374828340 | 2.114656777  |
| 1 | -1.937875377  | -3.852815340 | 0.839807777  |
| 1 | -5.035327377  | -4.869500340 | 3.721826777  |
| 6 | -4.610567377  | -4.452304340 | 0.992398777  |
| 6 | -6.002777377  | -4.252389340 | 1.213435777  |
| 6 | -4.172740377  | -4.466757340 | -0.344309223 |
| 6 | -6.847011377  | -3.901272340 | 0.163871777  |
| 1 | -6.407225377  | -4.262591340 | 2.233236777  |
| 6 | -5.005285377  | -4.097183340 | -1.424679223 |
| 1 | -3.115765377  | -4.662230340 | -0.547052223 |
| 6 | -6.357194377  | -3.711322340 | -1.157879223 |
| 1 | -7.892625377  | -3.669203340 | 0.398022777  |
| 6 | -7.090062377  | -2.922394340 | -2.154378223 |
| 6 | -6.435429377  | -2.550425340 | -3.380740223 |
| 6 | -8.317825377  | -2.303228340 | -1.841001223 |
| 6 | -6.962093377  | -1.474426340 | -4.120140223 |



|   |               |              |              |
|---|---------------|--------------|--------------|
| 6 | -8.835126377  | -1.218069340 | -2.572081223 |
| 1 | -8.824014377  | -2.581559340 | -0.912646223 |
| 6 | -8.089037377  | -0.736950340 | -3.702704223 |
| 1 | -6.388913377  | -1.114451340 | -4.978865223 |
| 6 | -8.358760377  | 0.606567660  | -4.224854223 |
| 6 | -9.310365377  | 1.441241660  | -3.555798223 |
| 6 | -7.557180377  | 1.201110660  | -5.236694223 |
| 6 | -9.258843377  | 2.837770660  | -3.768647223 |
| 6 | -7.531670377  | 2.577967660  | -5.432613223 |
| 1 | -6.874311377  | 0.579413660  | -5.828250223 |
| 6 | -8.314623377  | 3.445926660  | -4.619012223 |
| 1 | -9.913082377  | 3.471702660  | -3.163577223 |
| 1 | -6.819252377  | 2.989430660  | -6.157697223 |
| 6 | -7.963687377  | 4.884438660  | -4.480214223 |
| 6 | -10.024789377 | -0.485362340 | -2.116968223 |
| 6 | -10.250012377 | 0.846966660  | -2.590466223 |
| 6 | -10.939651377 | -1.045691340 | -1.186237223 |
| 6 | -11.377236377 | 1.561856660  | -2.105556223 |
| 6 | -12.039119377 | -0.321430340 | -0.718714223 |
| 6 | -12.258593377 | 0.994826660  | -1.181174223 |
| 1 | -10.794516377 | -2.077412340 | -0.841125223 |
| 1 | -11.578794377 | 2.573290660  | -2.480376223 |
| 1 | -12.736682377 | -0.781492340 | -0.004280223 |
| 6 | -5.166088377  | -3.187280340 | -3.755618223 |
| 6 | -4.577146377  | -3.016266340 | -5.037780223 |
| 6 | -4.461801377  | -3.968791340 | -2.786490223 |
| 6 | -3.335062377  | -3.566995340 | -5.355206223 |
| 6 | -3.221215377  | -4.548199340 | -3.142820223 |
| 6 | -2.630087377  | -4.350437340 | -4.402244223 |
| 1 | -5.115681377  | -2.451474340 | -5.809508223 |
| 1 | -2.913367377  | -3.424228340 | -6.359961223 |
| 1 | -2.676887377  | -5.148876340 | -2.404960223 |
| 6 | -7.707014377  | 2.615699660  | -0.111365223 |
| 6 | -7.754803377  | 2.855100660  | 1.334948777  |
| 6 | -7.226268377  | 4.048424660  | 1.871089777  |
| 6 | -6.629695377  | 5.051879660  | 0.983620777  |
| 6 | -6.580853377  | 4.819514660  | -0.406838223 |
| 6 | -7.131206377  | 3.579484660  | -0.965341223 |
| 6 | -6.261071377  | 3.155302660  | -2.066912223 |
| 6 | -6.000383377  | 1.785187660  | -2.269186223 |
| 6 | -6.597526377  | 0.785009660  | -1.379484223 |
| 6 | -7.438818377  | 1.189788660  | -0.324694223 |
| 6 | -7.321345377  | 0.547769660  | 0.989002777  |
| 6 | -7.515645377  | 1.577972660  | 2.014314777  |
| 6 | -6.757686377  | 1.542167660  | 3.204232777  |
| 6 | -6.208860377  | 2.781974660  | 3.760641777  |
| 6 | -6.439150377  | 4.011053660  | 3.106932777  |
| 6 | -5.355459377  | 4.990316660  | 2.984101777  |
| 6 | -5.473096377  | 5.635305660  | 1.671583777  |
| 6 | -4.310818377  | 5.963617660  | 0.943735777  |
| 6 | -4.261850377  | 5.719254660  | -0.500423223 |
| 6 | -5.373863377  | 5.162950660  | -1.164051223 |
| 6 | -5.177547377  | 4.134716660  | -2.192047223 |

|   |              |              |              |
|---|--------------|--------------|--------------|
| 6 | -3.873902377 | 3.705549660  | -2.520153223 |
| 6 | -3.603961377 | 2.279053660  | -2.733434223 |
| 6 | -4.647630377 | 1.335971660  | -2.611614223 |
| 6 | -4.408732377 | 0.057607660  | -1.929712223 |
| 6 | -5.613104377 | -0.278963340 | -1.166503223 |
| 6 | -5.501520377 | -0.897092340 | 0.094299777  |
| 6 | -6.373185377 | -0.477448340 | 1.194319777  |
| 6 | -5.585702377 | -0.516177340 | 2.432773777  |
| 6 | -5.774448377 | 0.475589660  | 3.418032777  |
| 6 | -4.617324377 | 1.056986660  | 4.108084777  |
| 6 | -4.886795377 | 2.483418660  | 4.319095777  |
| 6 | -3.842538377 | 3.425219660  | 4.201567777  |
| 6 | -4.082463377 | 4.700532660  | 3.517888777  |
| 6 | -2.876044377 | 5.041652660  | 2.759258777  |
| 6 | -2.987749377 | 5.662908660  | 1.500326777  |
| 6 | -2.118607377 | 5.240421660  | 0.398236777  |
| 6 | -2.906555377 | 5.274460660  | -0.838608223 |
| 6 | -2.716708377 | 4.286319660  | -1.828045223 |
| 6 | -1.734004377 | 3.220083660  | -1.615390223 |
| 6 | -2.281081377 | 1.979511660  | -2.174408223 |
| 6 | -2.056613377 | 0.751320660  | -1.515890223 |
| 6 | -3.136499377 | -0.233348340 | -1.395607223 |
| 6 | -3.020677377 | -0.875014340 | -0.079304223 |
| 6 | -3.313638377 | 0.626368660  | 3.786359777  |
| 6 | -4.181088377 | -1.201988340 | 0.651027777  |
| 6 | -4.229644377 | -0.964732340 | 2.097214777  |
| 6 | -3.116985377 | -0.405256340 | 2.761386777  |
| 6 | -1.911541377 | -0.059403340 | 2.003771777  |
| 6 | -1.359784377 | 1.181447660  | 2.562153777  |
| 6 | -2.227081377 | 1.606075660  | 3.664350777  |
| 6 | -2.485738377 | 2.978541660  | 3.867590777  |
| 6 | -1.889017377 | 3.979706660  | 2.977742777  |
| 6 | -1.049924377 | 3.574452660  | 1.920411777  |
| 6 | -1.169531377 | 4.216911660  | 0.603957777  |
| 6 | -0.982596377 | 3.184553660  | -0.420432223 |
| 6 | -0.750920377 | 1.910666660  | 0.261091777  |
| 6 | -1.283071377 | 0.721878660  | -0.274157223 |
| 6 | -1.873360377 | -0.283187340 | 0.612311777  |
| 6 | -0.788352377 | 2.147376660  | 1.706169777  |
| 0 | 0.000000000  | 0.000000000  | 0.000000000  |

## References:

- 1 A. D. Becke, *Phys. Rev. A* 1988, **38**, 3098-3100.
- 2 C. Lee, W. Yang and R. G. Parr, *Phys. Rev. B* 1988, **37**, 785-789.
- 3 F. Weigend and R. Ahlrichs, *Phys. Chem. Chem. Phys.* 2005, **7**, 3297-3305.
- 4 F. Weigend, *Phys. Chem. Chem. Phys.* 2006, **8**, 1057-1065.
- 5 K. Eichkorn, O. Treutler, H. Öhm, M. Häser and R. Ahlrichs, *Chem. Phys. Lett.* 1995, **240**, 283-290.
- 6 K. Eichkorn, F. Weigend, O. Treutler and R. Ahlrichs, *Theor. Chem. Acc.* 1997, **97**, 119-124.
- 7 F. Neese, *Wiley Interdiscip. Rev.: Comput. Mol. Sci.* 2012, **2**, 73-78.
- 8 F. Neese, *Wiley Interdiscip. Rev.: Comput. Mol. Sci.* 2018, **8**, e1327.
- 9 ORCA - an ab initio density functional, and semiempirical program package, version 4.2.1
- 10 S. Grimme, J. Antony, S. Ehrlich and H. Krieg, *J. Chem. Phys.* 2010, **132**, 154104.
- 11 S. Grimme, S. Ehrlich and L. Goerigk, *J. Comput. Chem.* 2011, **32**, 1456-1465.
- 12 S. Hirata and M. Head-Gordon, *Chem. Phys. Lett.* 1999, **314**, 291-299.
- 13 T. Yanai, D. P. Tew and N. C. Handy, *Chem. Phys. Lett.* 2004, **393**, 51-57.
- 14 Gaussian 16, Revision A.03, M. J. Frisch, G. W. Trucks, H. B. Schlegel, G. E. Scuseria, M. A. Robb, J. R. Cheeseman, G. Scalmani, V. Barone, G. A. Petersson, H. Nakatsuji, X. Li, M. Caricato, A. V. Marenich, J. Bloino, B. G. Janesko, R. Gomperts, B. Mennucci, H. P. Hratchian, J. V. Ortiz, A. F. Izmaylov, J. L. Sonnenberg, D. Williams-Young, F. Ding, F. Lipparini, F. Egidi, J. Goings, B. Peng, A. Petrone, T. Henderson, D. Ranasinghe, V. G. Zakrzewski, J. Gao, N. Rega, G. Zheng, W. Liang, M. Hada, M. Ehara, K. Toyota, R. Fukuda, J. Hasegawa, M. Ishida, T. Nakajima, Y. Honda, O. Kitao, H. Nakai, T. Vreven, K. Throssell, J. A. Montgomery, Jr., J. E. Peralta, F. Ogliaro, M. J. Bearpark, J. J. Heyd, E. N. Brothers, K. N. Kudin, V. N. Staroverov, T. A. Keith, R. Kobayashi, J. Normand, K. Raghavachari, A. P. Rendell, J. C. Burant, S. S. Iyengar, J. Tomasi, M. Cossi, J. M. Millam, M. Klene, C. Adamo, R. Cammi, J. W. Ochterski, R. L. Martin, K. Morokuma, O. Farkas, J. B. Foresman, and D. J. Fox, Gaussian, Inc., Wallingford CT, 2016.
- 15 R. S. Mulliken, *J. Chem. Phys.* 1955, **23**, 1833-1840.
- 16 R. S. Mulliken, *J. Chem. Phys.* 1955, **23**, 1841-1846.
- 17 P. O. Löwdin, *J. Chem. Phys.* 1950, **18**, 365-375.
- 18 F. L. Hirshfeld, *Theor. Chim. Acta* 1977, **44**, 129-138.
- 19 A. V. Marenich, S. V. Jerome, C. J. Cramer, D.G. Truhlar, *J. Chem. Theory Comput.* 2012, **8**, 527-541.
- 20 P. Bultinck, C. V. Alsenoy, P. W. Ayers, R. Carbó-Dorca, *J. Chem. Phys.*, 2007, **126**, 144111.
- 21 ADF 2018, SCM, Theoretical Chemistry, Vrije Universiteit, Amsterdam, The Netherlands, E.J. Baerends, T. Ziegler, A.J. Atkins, J. Autschbach, O. Baseggio, D. Bashford, A. Bérces, F.M. Bickelhaupt, C. Bo, P.M. Boerrigter, L. Cavallo, C. Daul, D.P. Chong, D.V. Chulhai, L. Deng, R.M. Dickson, J.M. Dieterich, D.E. Ellis, M. van Faassen, L. Fan, T.H. Fischer, A. Förster, C. Fonseca Guerra, M. Franchini, A. Ghysels, A. Giammona, S.J.A. van Gisbergen, A. Goetz, A.W. Götz, J.A. Groeneveld, O.V. Gritsenko, M. Grüning, S. Gusarov, F.E. Harris, P. van den Hoek, Z. Hu, C.R. Jacob, H. Jacobsen, L. Jensen, L. Joubert, J.W. Kaminski, G. van Kessel, C. König, F. Kootstra, A. Kovalenko, M.V. Krykunov, E. van Lenthe, D.A. McCormack, A. Michalak, M. Mitoraj, S.M. Morton, J. Neugebauer, V.P. Nicu, L. Noodleman, V.P. Osinga, S. Patchkovskii, M. Pavanello, C.A. Peeples, P.H.T. Philipsen, D. Post, C.C. Pye, H. Ramanantoanina, P. Ramos, W. Ravenek, J.I. Rodríguez, P. Ros, R. Rüger, P.R.T. Schipper, D.

- Schlüns, H. van Schoot, G. Schreckenbach, J.S. Seldenthuis, M. Seth, J.G. Snijders, M. Solà, M. Stener, M. Swart, D. Swerhone, V. Tognetti, G. te Velde, P. Vernooijs, L. Versluis, L. Visscher, O. Visser, F. Wang, T.A. Wesolowski, E.M. van Wezenbeek, G. Wiesenekker, S.K. Wolff, T.K. Woo, A.L. Yakovlev
- 22 A. V. Luzanov, A. A. Sukhorukov, and V.E. Umanskii, *Theor. Exp. Chem.* 1976, **10**, 354–361.
  - 23 M. Head-Gordon, A. M. Grana, D. Maurice and C. A. White, *J. Phys. Chem.* 1995, **99**, 14261–14270.
  - 24 G. A. Zhurko, Chemcraft 1.80 (build 523b) - graphical program for visualization of quantum chemistry computations. (<https://chemcraftprog.com>).
  - 25 T. Ziegler and A. Rauk, *Theor. Chim. Acta* 1977, **46**, 1-10.
  - 26 T. Ziegler and A. Rauk, *Inorg. Chem.* 1979, **18**, 1558-1565.
  - 27 T. Ziegler and A. Rauk, *Inorg. Chem.* 1979, **18**, 1755-1759.
  - 28 S. Grimme, *J. Comput. Chem.* 2004, **25**, 1463-1473.
  - 29 S. Grimme, *J. Comput. Chem.* 2006, **27**, 1787-1799.
  - 30 F. Plasser and H. Lischka, *J. Chem. Theory Comput.* 2012, **8**, 2777-2789.
  - 31 F. Plasser, S. A. Böppler, M. Wormit and A. Dreuw, *J. Chem. Phys.* 2014, **141**, 024107.
  - 32 A. V. Luzanov and O.A. Zhikol, *Int. J. Quantum Chem.* 2010, **110**, 902-924.
  - 33 A. Klamt, G. Schüürmann, *J. Chem. Soc. Perkin Trans.* 1993, **2**, 799–805.
  - 34 J. Tomasi, B. Mennucci and R. Cammi, *Chem. Rev.* 2005, **105**, 2999-3093.
  - 35 A.A. Voityuk and S.F. Vyboishchikov, *Phys. Chem. Chem. Phys.* 2019, **21**, 18706-18713.
  - 36 S.F. Vyboishchikov and A.A. Voityuk, *Phys. Chem. Chem. Phys.* 2020, **22**, 14591-14598.
  - 37 A. Klamt, G. Schüürmann, *J. Chem. Soc. Perkin Trans.* 1993, **2**, 799–805.
  - 38 J. L. Pascual-Ahuir, E. Silla, and I. Tuñón, *J. Comp. Chem.* 1994, **15**, 1127–1138.
  - 39 A. Klamt, *J. Phys. Chem.* 1996, **100**, 3349-3353.
  - 40 R. A. Marcus and N. Sutin, *Biochim. Biophys. Acta, Rev. Bioenerg.* 1985, **811**, 265-322.
  - 41 A. A. Voityuk and N. Rösch, *J. Chem. Phys.* 2002, **117**, 5607-5616.
  - 42 A. A. Voityuk, *Phys. Chem. Chem. Phys.* 2012, **14**, 13789-13793.
  - 43 J. Ulstrup, J. Jortner, *J. Chem. Phys.* 1975, **63**, 4358-4368.
  - 44 J. Jortner, *J. Chem. Phys.* 1976, **64**, 4860-4867.
  - 45 R. F. W. Bader, *Chem. Rev.* 1991, **91**, 893– 928.
  - 46 R. F. W. Bader, *Atoms in Molecules: A Quantum Theory; International Series of Monographs on Chemistry 22; Oxford University Press: Oxford, U.K., 1990.*
  - 47 C. F. Matta, N. Castillo and R. J. Boyd, *J. Phys. Chem. B* 2006, **110**, 563–578.
  - 48 C. R. Wick and T. Clark, *J. Mol. Model.* 2018, **24**, 142.
  - 49 P. S. V. Kumar, V. Raghavendra and V Subramanian, *J. Chem. Sci.* 2016, **128**, 1527–1536.
  - 50 Keith, T. A. AIMAll, version 14.06.21; TK Gristmill Software: Overland Park, KS, **2014**.
  - 51 E. Johnson, S. Keinan, P. Mori-Sánchez, J. Contreras-García, A. Cohen and W. Yang, *J. Am. Chem. Soc.* 2010, **132**, 6498–6506.
  - 52 J. Contreras-García, E. Johnson, S. Keinan, R. Chaudret, J. Piquemal, D. Beratan and W. Yang, *J. Chem. Theory Comput.* 2011, **7**, 625–632.
  - 53 J. Contreras-García, W. Yang and E. Johnson, *J. Phys. Chem. A*, 2011, **115**, 12983–12990.
  - 54 T. Lu and F. Chen, *J. Comput. Chem.* 2012, **33**, 580-592.
  - 55 J. A. Rackers, Z. Wang, C. Lu, M. L. Laury, L. Lagardère, M. J. Schnieders, J.-P. Piquemal, P. Ren, and J. W. Ponder, *J. Chem. Theory Comput.* 2018, **14**, 5273–5289.

- 56 L. Lagardère, L.-H. Jolly, F. Lipparini, F. Aviat, B. Stamm, Z. F. Jing, M. H. arger, H. Torabifard, G. A. Cisneros, M. J. Schnieders, N. Gresh, Y. Maday, P. Y. Ren, J. W. Ponder and J.-P. Piquemal, *Chem. Sci.*, 2018, **9**, 956-972.
- 57 O. Adjoua, L. Lagardère, L.-H. Jolly, A. Durocher, T. Very, I. Dupays, Z. Wang, T. J. Inizan, F. Célerse, P. Y. Ren, J. W. Ponder and J.-P. Piquemal, *J. Chem. Theory Comput.* 2021, **17**, 2034–2053.
- 58 TINKER-HP Software Tools for Molecular Design. (<https://github.com/TinkerTools/tinker-hp>)
- 59 T. A. Halgren, *J. Comput. Chem.*, 1996, **17**, 490-519.
- 60 T. A. Halgren, *J. Comput. Chem.*, 1996, **17**, 520-552.
- 61 T. A. Halgren, *J. Comput. Chem.*, 1996, **17**, 553-586.
- 62 T. A. Halgren and R. B. Nachbar, *J. Comput. Chem.*, 1996, **17**, 587-615.
- 63 T. A. Halgren, *J. Comput. Chem.*, 1996, **17**, 616-641.
- 64 H.S. Andersen, *J. Chem. Phys.* 1980, **72**, 2384.
- 65 H. Tanaka, K. Nakanishi, and N. Watanabe, *J. Chem. Phys.* 1983, **78**, 2626.
- 66 W. Humphrey, A. Dalke and K. Schulten, *J. Molec. Graphics*, 1996, **14**, 33-38.
